# Supplementary material for: BF3·Et2O-Mediated annulation of α-keto acids with aliphatic ketones for the synthesis of γ-hydroxy-butenolides and γ-alkylidene-butenolides
Source: Royal Society of Chemistry journal article supplement (doi:10.1039/d2ra04546j), 2022-01-01

## Supporting Information

### **BF<sub>3</sub>·Et<sub>2</sub>O-mediated annulation of $\alpha$ -keto acids with aliphatic ketones for the synthesis of $\gamma$ -hydroxy-butenolides and $\gamma$ -alkylidene- butenolides**

Zhenfeng Cheng,<sup>a</sup> Qingyun Gu,<sup>a</sup> Yushan Xie,<sup>a</sup> Yanan Zhang<sup>a</sup> and Xiaobao Zeng<sup>\*a</sup>

*School of Pharmacy, Nantong University, Nantong 226001, P.R. China.*

#### **List**

- 1. General Information.....S2**
- 2. Preparation and characterizations of compounds 3aa-p and 4aa-i.....S2-12**
- 3. X-ray Crystallographic Data of 3af.....S12-20**
- 4. References.....S20**
- 5. <sup>1</sup>H NMR and <sup>13</sup>C NMR spectra of compounds 3aa-p and 4aa-i.....S21-45**

## 1. General Information

All melting points were determined on a Yanaco melting point apparatus and are uncorrected. IR spectra were recorded as KBr pellets on a Nicolet FT-IR 5DX spectrometer.  $^1\text{H-NMR}$  (400 MHz) and  $^{13}\text{C-NMR}$  (100 MHz) spectra were recorded in  $\text{CDCl}_3$ . TMS was used as an internal reference and  $J$  values are given in Hz. HR-MS were obtained on a Bruker microTOF-Q II spectrometer. PE is petroleum ether (60–90 °C). All  $\alpha$ -keto acids<sup>[1]</sup> and ketones are known compounds, which were purchased directly or were prepared according to the reported procedures.

## 2. Preparation and characterizations of compounds 3aa-p and 4aa-i

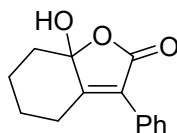

**Synthesis of 7a-hydroxy-3-phenyl-5,6,7,7a-tetrahydrobenzofuran-2(4H)-one (3aa).** To a stirred mixture of 2-oxo-2-phenylacetic acid (**1a**, 75 mg, 0.5 mmol) and cyclohexanone (**2a**, 98 mg, 1 mmol) in toluene (2 mL) was added  $\text{BF}_3 \cdot \text{Et}_2\text{O}$  (0.2 equiv., 14 mg) at room temperature. After the reaction system was heated at 40 °C for 1 h, it was cooled down to room temperature again and was quenched by adding  $\text{H}_2\text{O}$  (15 mL). The resultant mixture was then extracted with  $\text{CH}_2\text{Cl}_2$  ( $3 \times 15$  mL). The combined organic layers were washed with brine ( $2 \times 15$  mL) and dried over  $\text{MgSO}_4$ . The solvent was removed by vacuum and the residue was purified by flash chromatography (silica gel, 25% EtOAc in PE) to give 99 mg (86%) of the desired product **3aa** as colorless solid, mp 102–104 °C. IR (KBr)  $\nu$  3414, 1730  $\text{cm}^{-1}$ ;  $^1\text{H NMR}$  (400 MHz,  $\text{CDCl}_3$ )  $\delta$  7.43–7.35 (m, 5H), 4.31 (brs, 1H), 2.96 (d,  $J = 13.4$  Hz, 1H), 2.53–2.45 (m, 2H), 2.00–1.97 (m, 1H), 1.81–1.78 (m, 2H), 1.62–1.57 (m, 1H), 1.36–1.28 (m, 1H);  $^{13}\text{C NMR}$  (100 MHz,  $\text{CDCl}_3$ )  $\delta$  170.9, 162.2, 129.2, 128.9, 128.6, 128.5, 124.4, 103.2, 38.3, 26.9, 25.6, 22.0; HRMS  $m/z$  (ESI) calcd for  $\text{C}_{14}\text{H}_{14}\text{O}_3$ , ( $\text{M}+\text{H}$ )<sup>+</sup> 231.1016; found 231.1014.

The products **3ab-p** were prepared following the similar procedure above.

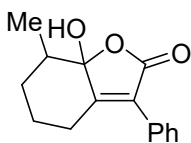

**7a-hydroxy-7-methyl-3-phenyl-5,6,7,7a-tetrahydrobenzofuran-2(4H)-one**

**(3ab).** 87 mg (71%), white solid, mp 144–146 °C. IR (KBr)  $\nu$  3362, 1748  $\text{cm}^{-1}$ ;  $^1\text{H}$  NMR (400 MHz,  $\text{CDCl}_3$ )  $\delta$  7.44-7.35 (m, 5H), 3.64 (s, 1H), 2.98-2.93 (m, 1H), 2.46 (td,  $J = 13.5, 5.7$  Hz, 1H), 1.98-1.95 (m, 1H), 1.80-1.74 (m, 1H), 1.70-1.67 (m, 1H), 1.56 (ddd,  $J = 26.1, 13.1, 3.6$  Hz, 1H), 1.43-1.32 (m, 1H), 1.18 (d,  $J = 6.6$  Hz, 3H);  $^{13}\text{C}$  NMR (100 MHz,  $\text{CDCl}_3$ )  $\delta$  170.9, 162.8, 129.3, 128.9, 128.6, 128.4, 124.2, 104.4, 42.7, 30.2, 26.4, 25.3, 13.8. HRMS  $m/z$  (ESI) calcd for  $\text{C}_{15}\text{H}_{16}\text{O}_3$ ,  $(\text{M}+\text{H})^+$  245.1172; found 245.1170.

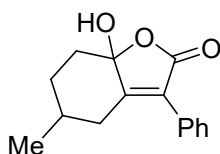

**3-Phenyl-6-methyl-7a-hydroxy-5,6,7,7a-tetrahydrobenzofuran-2(4H)-one**

**(3ac).** 104 mg (85%), yellow solid, mp 108–110 °C. IR (KBr)  $\nu$  3364, 1746  $\text{cm}^{-1}$ ;  $^1\text{H}$  NMR (400 MHz,  $\text{CDCl}_3$ )  $\delta$  7.42-7.34 (m, 5H), 4.87 (brs, 1H), 2.93-2.89 (m, 1H), 2.58-2.50 (m, 1H), 2.41-2.38 (m, 1H), 2.07-1.98 (m, 1H), 1.93-1.89 (m, 1H), 1.27-1.20 (m, 1H), 1.05-0.98 (m, 1H), 0.93 (d,  $J = 6.6$  Hz, 3H);  $^{13}\text{C}$  NMR (100 MHz,  $\text{CDCl}_3$ )  $\delta$  171.3, 162.2, 129.2, 128.9, 128.5, 128.4, 124.2, 103.6, 45.7, 35.1, 28.8, 25.0, 20.9; HRMS  $m/z$  (ESI) calcd for  $\text{C}_{15}\text{H}_{16}\text{O}_3$ ,  $(\text{M}+\text{H})^+$  245.1172; found 245.1172.

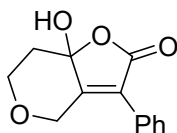

**3-Phenyl-7a-hydroxy-7,7a-dihydro-4H-furo[3,2-c]pyran-2(6H)-one (3ad).** 70 mg (60%), colorless oil. IR (KBr)  $\nu$  3421, 1765  $\text{cm}^{-1}$ ;  $^1\text{H}$  NMR (400 MHz,  $\text{CDCl}_3$ )  $\delta$  7.40-7.34 (m, 5H), 4.75 (d,  $J = 13.2$  Hz, 1H), 4.41-4.38 (m, 2H), 3.98 (dd,  $J = 11.7, 5.0$  Hz, 1H), 3.86-3.80 (m, 1H), 2.37 (d,  $J = 13.4$  Hz, 1H), 2.08-2.00 (m, 1H);  $^{13}\text{C}$

NMR (100 MHz, CDCl<sub>3</sub>)  $\delta$  170.3, 154.8, 129.5, 128.9, 128.7, 128.1, 126.1, 100.9, 64.6, 62.7, 40.0; HRMS  $m/z$  (ESI) calcd for C<sub>13</sub>H<sub>12</sub>O<sub>4</sub>, (M+H)<sup>+</sup> 233.0808; found 233.0808.

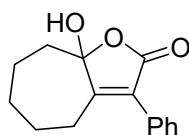

**3-Phenyl-8a-hydroxy-4,5,6,7,8a-hexahydro-2H-cyclohepta[b]furan-2-one**

**(3ae).** 96 mg (79%), white solid, mp 84–86 °C. IR (KBr)  $\nu$  3306, 1744 cm<sup>-1</sup>; <sup>1</sup>H NMR (400 MHz, CDCl<sub>3</sub>)  $\delta$  7.44-7.34 (m, 5H), 4.55 (brs, 1H), 2.82-2.64 (m, 2H), 2.34 (ddd,  $J$  = 14.2, 6.1, 2.7 Hz, 1H), 1.96-1.55 (m, 6H), 1.45-1.36 (m, 1H); <sup>13</sup>C NMR (100 MHz, CDCl<sub>3</sub>)  $\delta$  171.3, 164.2, 129.6, 128.9, 128.5, 128.3, 127.1, 107.7, 38.0, 28.5, 26.6, 25.6, 23.5. HRMS  $m/z$  (ESI) calcd for C<sub>15</sub>H<sub>16</sub>O<sub>3</sub>, (M+H)<sup>+</sup> 245.1172; found 245.1171.

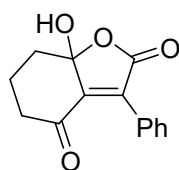

**3-Phenyl-7a-hydroxy-5,6,7,7a-tetrahydrobenzofuran-2,4-dione (3af).** 71 mg

(58%), white solid, mp 172–174 °C. IR (KBr)  $\nu$  3341, 1764, 1715 cm<sup>-1</sup>; <sup>1</sup>H NMR (400 MHz, CDCl<sub>3</sub>)  $\delta$  7.87-7.79 (m, 2H), 7.47-7.34 (m, 3H), 4.09 (s, 1H), 2.78-2.68 (m, 1H), 2.68-2.59 (m, 1H), 2.43-2.34 (m, 1H), 2.20-2.01 (m, 2H), 2.00-1.92 (m, 1H); <sup>13</sup>C NMR (100 MHz, CDCl<sub>3</sub>)  $\delta$  196.7, 169.0, 151.3, 130.9, 130.3, 130.2, 128.2, 127.3, 105.4, 42.8, 36.0, 19.6. HRMS  $m/z$  (ESI) calcd for C<sub>14</sub>H<sub>12</sub>O<sub>4</sub>, (M+H)<sup>+</sup> 245.0808; found 245.0808.

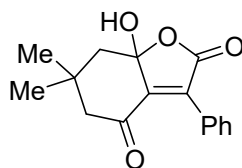

**3-Phenyl-6,6-dimethyl-7a-hydroxy-5,6,7,7a-tetrahydrobenzofuran-2,4-dione (3ag).** 76 mg (56%), white solid, mp 138–140 °C. IR (KBr)  $\nu$  3326, 1763, 1711  $\text{cm}^{-1}$ ;  $^1\text{H}$  NMR (400 MHz,  $\text{CDCl}_3$ )  $\delta$  7.83-7.80 (m, 2H), 7.45-7.36 (m, 3H), 4.18 (s, 1H), 2.60 (dd,  $J = 14.9, 1.7$  Hz, 1H), 2.46 (dd,  $J = 14.2, 1.7$  Hz, 1H), 2.35 (d,  $J = 14.9$  Hz, 1H), 2.01 (d,  $J = 14.2$  Hz, 1H), 1.22 (s, 3H), 1.09 (s, 3H);  $^{13}\text{C}$  NMR (100 MHz,  $\text{CDCl}_3$ )  $\delta$  196.6, 169.0, 150.7, 131.0, 130.2, 130.1, 128.2, 127.4, 105.4, 56.4, 48.1, 32.8, 32.1, 28.3. HRMS  $m/z$  (ESI) calcd for  $\text{C}_{16}\text{H}_{16}\text{O}_4$ ,  $(\text{M} + \text{H})^+$  273.1121; found 273.1121.

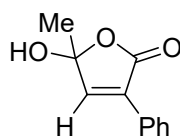

**3-Phenyl-4-methyl-5-hydroxyfuran-2(5H)-one (3ah).** 56 mg (59%), white solid, mp 91–93 °C. IR (KBr)  $\nu$  3362, 2953, 1731  $\text{cm}^{-1}$ ;  $^1\text{H}$  NMR (400 MHz,  $\text{CDCl}_3$ )  $\delta$  7.78-7.75 (m, 2H), 7.40-7.33 (m, 3H), 7.30 (s, 1H), 4.41 (s, 1H), 1.73 (s, 3H);  $^{13}\text{C}$  NMR (100 MHz,  $\text{CDCl}_3$ )  $\delta$  170.0, 146.4, 132.5, 129.8, 128.6 (2C), 127.4, 103.7, 24.7. HRMS  $m/z$  (ESI) calcd for  $\text{C}_{11}\text{H}_{10}\text{O}_3$ ,  $(\text{M} + \text{H})^+$  191.0703; found 191.0704.

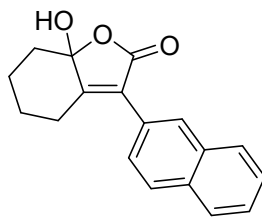

**3-(Naphthalen-2-yl)-7a-hydroxy-5,6,7,7a-tetrahydrobenzofuran-2(4H)-one (3ai).** 119 mg (85%), white solid, mp 135–137 °C. IR (KBr)  $\nu$  3399, 1750  $\text{cm}^{-1}$ ;  $^1\text{H}$  NMR (400 MHz,  $\text{CDCl}_3$ )  $\delta$  7.89 (s, 1H), 7.78-7.73 (m, 3H), 7.49-7.41 (m, 3H), 4.70 (s, 1H), 2.98 (d,  $J = 13.7$  Hz, 1H), 2.60-2.44 (m, 2H), 2.00-1.89 (m, 1H), 1.82-1.75 (m, 2H), 1.63-1.55 (m, 1H), 1.37-1.17 (m, 1H);  $^{13}\text{C}$  NMR (100 MHz,  $\text{CDCl}_3$ )  $\delta$  171.3, 162.7, 133.0, 132.9, 128.6, 128.2, 128.0, 127.6, 126.6 (2C), 126.2, 126.1, 124.3, 103.5,

38.2, 26.9, 25.8, 22.0; HRMS  $m/z$  (ESI) calcd for  $C_{18}H_{16}O_3$ ,  $(M+H)^+$  281.1172; found 281.1170.

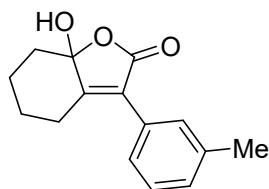

**3-(3-Methylphenyl)-7a-hydroxy-5,6,7,7a-tetrahydrobenzofuran-2(4H)-one**

**(3aj).** 96 mg (79%), white solid, mp 104–106 °C. IR (KBr)  $\nu$  3402, 1743  $cm^{-1}$ ;  $^1H$  NMR (400 MHz,  $CDCl_3$ )  $\delta$  7.28-7.24 (m, 2H), 7.20-7.16 (m, 2H), 4.44 (s, 1H), 2.94 (d,  $J = 13.6$  Hz, 1H), 2.52-2.45 (m, 2H), 2.35 (s, 3H), 1.99-1.96 (m, 1H), 1.79-1.77 (m, 2H), 1.60-1.55 (m, 1H), 1.33-1.27 (m, 1H);  $^{13}C$  NMR (100 MHz,  $CDCl_3$ )  $\delta$  171.1, 162.1, 138.1, 129.5, 129.4, 129.1, 128.3, 126.0, 124.4, 103.3, 38.3, 26.9, 25.6, 22.0, 21.4; HRMS  $m/z$  (ESI) calcd for  $C_{15}H_{16}O_3$ ,  $(M+H)^+$  245.1172; found 245.1171.

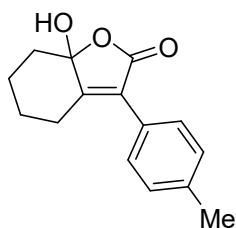

**3-(4-Methylphenyl)-7a-hydroxy-5,6,7,7a-tetrahydrobenzofuran-2(4H)-one**

**(3ak).** 102 mg (84%), white solid, mp 131–133 °C. IR (KBr)  $\nu$  3386, 1754  $cm^{-1}$ ;  $^1H$  NMR (400 MHz,  $CDCl_3$ )  $\delta$  7.32 (d,  $J = 8.0$  Hz, 2H), 7.19 (d,  $J = 7.8$  Hz, 2H), 4.23 (brs, 1H), 2.95 (d,  $J = 13.7$  Hz, 1H), 2.52-2.45 (m, 2H), 2.37 (s, 3H) 1.99-1.96 (m, 1H), 1.81-1.77 (m, 2H), 1.61-1.56 (m, 1H), 1.35-1.25 (m, 1H);  $^{13}C$  NMR (100 MHz,  $CDCl_3$ )  $\delta$  171.0, 161.5, 138.6, 129.1, 128.8, 126.3, 124.3, 103.2, 38.2, 26.9, 25.6, 22.1, 21.3. HRMS  $m/z$  (ESI) calcd for  $C_{15}H_{16}O_3$ ,  $(M+H)^+$  245.1172; found 245.1172.

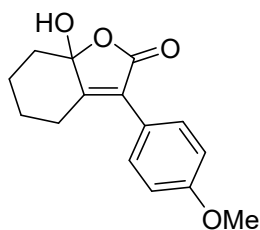

**3-(4-Methoxyphenyl)-7a-hydroxy-5,6,7,7a-tetrahydrobenzofuran-2(4H)-one**

**(3al).** 73 mg (56%), white solid, mp 98–100 °C. IR (KBr)  $\nu$  3419, 1746  $\text{cm}^{-1}$ ;  $^1\text{H}$  NMR (400 MHz,  $\text{CDCl}_3$ )  $\delta$  7.37 (d,  $J = 8.8$  Hz, 2H), 6.91 (d,  $J = 8.8$  Hz, 2H), 4.25 (s, 1H), 3.82 (s, 3H), 2.94 (d,  $J = 13.6$  Hz, 1H), 2.52–2.45 (m, 2H), 1.99–1.96 (m, 1H), 1.79–1.78 (m, 2H), 1.62–1.56 (m, 1H), 1.34–1.26 (m, 1H);  $^{13}\text{C}$  NMR (100 MHz,  $\text{CDCl}_3$ )  $\delta$  171.1, 160.6, 159.7, 130.3, 123.9, 121.6, 113.9, 103.2, 55.3, 38.2, 26.8, 25.6, 22.1; HRMS  $m/z$  (ESI) calcd for  $\text{C}_{15}\text{H}_{16}\text{O}_4$ ,  $(\text{M}+\text{H})^+$  261.1121; found 261.1123.

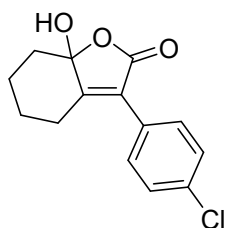

**3-(4-Chlorophenyl)-7a-hydroxy-5,6,7,7a-tetrahydrobenzofuran-2(4H)-one**

**(3am).** 100 mg (76%), white solid, mp 156–158 °C. IR (KBr)  $\nu$  3375, 1752  $\text{cm}^{-1}$ ;  $^1\text{H}$  NMR (400 MHz,  $\text{CDCl}_3$ )  $\delta$  7.35 (s, 4H), 4.19 (brs, 1H), 2.91 (d,  $J = 13.3$  Hz, 1H), 2.55–2.46 (m, 2H), 2.03–1.99 (m, 1H), 1.82–1.80 (m, 2H), 1.65–1.57 (m, 1H), 1.38–1.25 (m, 1H);  $^{13}\text{C}$  NMR (100 MHz,  $\text{CDCl}_3$ )  $\delta$  170.7, 162.7, 134.8, 130.2, 128.7, 127.5, 123.4, 103.4, 38.2, 26.9, 25.7, 22.0; HRMS  $m/z$  (ESI) calcd for  $\text{C}_{14}\text{H}_{13}\text{ClO}_3$ ,  $(\text{M}+\text{H})^+$  265.0626; found 265.0624.

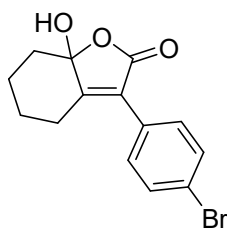

**3-(4-Bromophenyl)-7a-hydroxy-5,6,7,7a-tetrahydrobenzofuran-2(4H)-one**

**(3an).** 123 mg (80%), white solid, mp 168–170 °C. IR (KBr)  $\nu$  3263, 1725  $\text{cm}^{-1}$ ;  $^1\text{H}$  NMR (400 MHz,  $\text{CDCl}_3$ )  $\delta$  7.53–7.50 (m, 2H), 7.30–7.28 (m, 2H), 3.95 (s, 1H), 2.94–2.90 (m, 1H), 2.55–2.46 (m, 2H), 2.04–1.99 (m, 1H), 1.84–1.80 (m, 2H), 1.66–1.58 (m, 1H), 1.38–1.25 (m, 1H);  $^{13}\text{C}$  NMR (100 MHz,  $\text{CDCl}_3$ )  $\delta$  170.5, 162.6, 131.7, 130.5, 128.0, 123.5, 123.1, 103.3, 38.3, 26.9, 25.7, 22.0; HRMS  $m/z$  (ESI) calcd for  $\text{C}_{14}\text{H}_{13}\text{BrO}_3$ ,  $(\text{M}+\text{H})^+$  309.0121; found 309.0121.

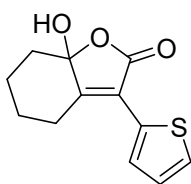

**3-(Thiophen-2-yl)-7a-hydroxy-5,6,7,7a-tetrahydrobenzofuran-2(4H)-one**

**(3ao).** 85 mg (72%), white solid, mp 70–72 °C. IR (KBr)  $\nu$  3378, 2944, 1731  $\text{cm}^{-1}$ ;  $^1\text{H}$  NMR (400 MHz,  $\text{CDCl}_3$ )  $\delta$  7.64 (d,  $J = 3.7$  Hz, 1H), 7.39 (d,  $J = 5.1$  Hz, 1H), 7.09–7.07 (m, 1H), 3.92 (brs, 1H), 3.28–3.23 (m, 1H), 2.58–2.45 (m, 2H), 2.07–2.02 (m, 1H), 1.85–1.79 (m, 2H), 1.63–1.55 (m, 1H), 1.43–1.33 (m, 1H);  $^{13}\text{C}$  NMR (100 MHz,  $\text{CDCl}_3$ )  $\delta$  169.8, 158.5, 130.7, 128.5, 127.3, 126.9, 118.2, 103.3, 38.3, 26.7, 26.2, 22.0; HRMS  $m/z$  (ESI) calcd for  $\text{C}_{12}\text{H}_{12}\text{SO}_3$ ,  $(\text{M}+\text{H})^+$  237.0580; found 237.0586.

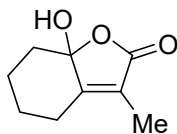

**3-Methyl-7a-hydroxy-5,6,7,7a-tetrahydrobenzofuran-2(4H)-one (3ap).** 60 mg (71%), white solid, mp 115–117 °C (lit.<sup>[2]</sup> 126–128 °C).  $^1\text{H}$  NMR (400 MHz,  $\text{CDCl}_3$ )  $\delta$  4.71 (brs, 1H), 2.69 (d,  $J = 13.4$  Hz, 1H), 2.45–2.30 (m, 2H), 2.04–2.00 (m, 1H), 1.78–1.73 (m, 5H), 1.53–1.45 (m, 1H), 1.32–1.25 (m, 1H);  $^{13}\text{C}$  NMR (100 MHz,  $\text{CDCl}_3$ )  $\delta$  173.2, 161.4, 120.8, 103.9, 38.0, 26.6, 25.0, 22.2, 8.0.



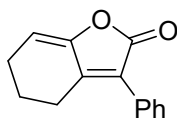

**Synthesis of 3-phenyl-5,6-dihydrobenzofuran-2(4H)-one (4a).** To a stirred mixture of 2-oxo-2-phenylacetic acid (**1a**, 75 mg, 0.5 mmol) and cyclohexanone (**2a**, 98 mg, 1 mmol) in toluene (2 mL) was added  $\text{BF}_3 \cdot \text{Et}_2\text{O}$  (36 mg, 0.25 mmol) at room temperature. After the reaction system was heated at 70 °C for 4 h, it was cooled down to room temperature again and was quenched by adding  $\text{H}_2\text{O}$  (15 mL). The resultant mixture was then extracted with  $\text{CH}_2\text{Cl}_2$  ( $3 \times 15$  mL). The combined organic layers were washed with brine ( $2 \times 15$  mL) and dried over  $\text{MgSO}_4$ . The solvent was removed by vacuum and the residue was purified by flash chromatography (silica gel, 10% EtOAc in PE) to give 87 mg (82%) of the desired product **4a** as white solid, mp 102–104 °C (lit.<sup>[3]</sup> yellow oil).  $^1\text{H}$  NMR (400 MHz,  $\text{CDCl}_3$ )  $\delta$  7.69–7.61 (m, 2H), 7.45–7.41 (m, 2H), 7.39–7.32 (m, 1H), 5.93 (t,  $J = 4.7$  Hz, 1H), 2.91 (t,  $J = 6.5$  Hz, 2H), 2.44 (dd,  $J = 10.9, 5.8$  Hz, 2H), 1.92–1.86 (m, 2H);  $^{13}\text{C}$  NMR (100 MHz,  $\text{CDCl}_3$ )  $\delta$  169.2, 149.2, 147.7, 130.0, 128.5, 128.4 (2C), 121.5, 110.8, 24.3, 23.6, 22.7.

The products **4ab-i** were prepared by the similar procedure.

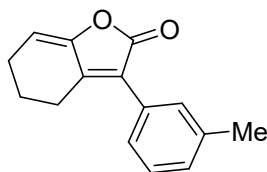

**3-(3-Methylphenyl)-5,6-dihydrobenzofuran-2(4H)-one (4ab).** 86 mg (76%), white solid, mp 80–82 °C. IR (KBr)  $\nu$  3341, 1765  $\text{cm}^{-1}$ ;  $^1\text{H}$  NMR (400 MHz,  $\text{CDCl}_3$ )  $\delta$  7.48 (s, 1H), 7.42 (d,  $J = 7.8$  Hz, 1H), 7.32 (t,  $J = 7.6$  Hz, 1H), 7.17 (d,  $J = 7.4$  Hz, 1H), 5.92 (t,  $J = 4.7$  Hz, 1H), 2.90 (t,  $J = 6.5$  Hz, 2H), 2.44 (dd,  $J = 10.7, 5.9$  Hz, 2H), 2.39 (s, 3H), 1.92–1.85 (m, 2H);  $^{13}\text{C}$  NMR (100 MHz,  $\text{CDCl}_3$ )  $\delta$  169.2, 149.3, 147.6, 138.2, 129.9, 129.3, 129.0, 128.4, 125.5, 121.7, 110.6, 24.3, 23.6, 22.7, 21.5. HRMS  $m/z$  (ESI) calcd for  $\text{C}_{15}\text{H}_{14}\text{O}_2$ ,  $(\text{M}+\text{H})^+$  227.1067; found 227.1067.

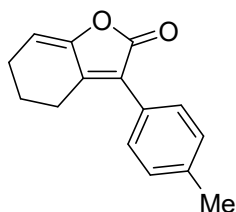

**3-(4-Methylphenyl)-5,6-dihydrobenzofuran-2(4H)-one (4ac).** 91 mg (80%), white solid, mp 96–98 °C. IR (KBr)  $\nu$  3264, 1778  $\text{cm}^{-1}$ ;  $^1\text{H}$  NMR (400 MHz,  $\text{CDCl}_3$ )  $\delta$  7.55 (d,  $J = 8.2$  Hz, 2H), 7.24 (d,  $J = 8.1$  Hz, 2H), 5.90 (t,  $J = 4.7$  Hz, 1H), 2.89 (t,  $J = 6.5$  Hz, 2H), 2.43 (dd,  $J = 10.9, 5.7$  Hz, 2H), 2.38 (s, 3H), 1.92–1.85 (m, 2H).  $^{13}\text{C}$  NMR (100 MHz,  $\text{CDCl}_3$ )  $\delta$  169.3, 149.3, 146.9, 138.5, 129.2, 128.3, 127.1, 121.5, 110.3, 24.3, 23.6, 22.7, 21.3. HRMS  $m/z$  (ESI) calcd for  $\text{C}_{15}\text{H}_{14}\text{O}_2$ ,  $(\text{M}+\text{H})^+$  227.1067; found 227.1065.

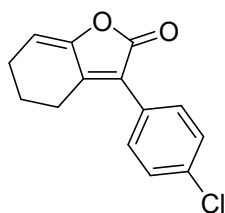

**3-(4-Chlorophenyl)-5,6-dihydrobenzofuran-2(4H)-one (4ad).** 90 mg (73%), white solid, mp 174–176 °C IR (KBr)  $\nu$  3410, 1756  $\text{cm}^{-1}$ ;  $^1\text{H}$  NMR (400 MHz,  $\text{CDCl}_3$ )  $\delta$  7.63–7.60 (m, 2H), 7.42–7.39 (m, 2H), 5.97 (t,  $J = 4.7$  Hz, 1H), 2.89 (t,  $J = 6.5$  Hz, 2H), 2.46 (dd,  $J = 10.8, 5.8$  Hz, 2H), 1.94–1.88 (m, 2H);  $^{13}\text{C}$  NMR (100 MHz,  $\text{CDCl}_3$ )  $\delta$  168.9, 149.1, 147.9, 134.5, 129.7, 128.8, 128.5, 120.5, 111.4, 24.3, 23.6, 22.6. HRMS  $m/z$  (ESI) calcd for  $\text{C}_{14}\text{H}_{11}\text{ClO}_2$ ,  $(\text{M}+\text{H})^+$  247.0520; found 247.0520.

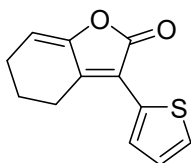

**3-(Thiophen-2-yl)-5,6-dihydrobenzofuran-2(4H)-one (4ae).**<sup>[5]</sup> 67 mg (61%), yellow solid, mp 56–58 °C. IR (KBr)  $\nu$  3341, 1769  $\text{cm}^{-1}$ .  $^1\text{H}$  NMR (400 MHz,  $\text{CDCl}_3$ )  $\delta$  7.77 (d,  $J = 3.5$  Hz, 1H), 7.44 (dd,  $J = 5.0, 0.7$  Hz, 1H), 7.15–7.13(m, 1H), 5.93 (t,  $J$

= 4.7 Hz, 1H), 2.95 (t,  $J$  = 6.6 Hz, 2H), 2.45 (dd,  $J$  = 10.9, 5.9 Hz, 2H), 1.99-1.92 (m, 2H);  $^{13}\text{C}$  NMR (100 MHz,  $\text{CDCl}_3$ )  $\delta$  168.2, 149.3, 143.6, 132.2, 127.7, 127.6, 127.2, 116.5, 110.9, 24.2, 23.4, 22.3.

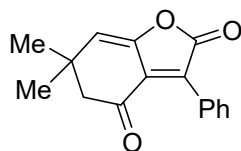

**3-Phenyl-6,6-dimethyl-5,6-dihydrobenzofuran-2,4-dione (4af).** 71 mg (56%), brown solid, mp 108–110 °C. IR (KBr)  $\nu$  3491, 2965, 1762, 1699  $\text{cm}^{-1}$ ;  $^1\text{H}$  NMR (400 MHz,  $\text{CDCl}_3$ )  $\delta$  8.04-8.02 (m, 2H), 7.46-7.44 (m, 3H), 6.04 (s, 1H), 2.70 (s, 2H), 1.30 (s, 6H);  $^{13}\text{C}$  NMR (100 MHz,  $\text{CDCl}_3$ )  $\delta$  193.7, 168.1, 148.2, 135.4, 131.0, 130.3, 128.2, 127.9, 127.7, 120.9, 56.3, 36.5, 30.3. HRMS  $m/z$  (ESI) calcd for  $\text{C}_{16}\text{H}_{14}\text{O}_3$ , (M+H) $^+$  255.1016; found 255.1016.

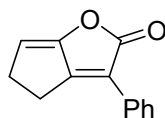

**3-Phenyl-4,5-dihydro-2H-cyclopenta[b]furan-2-one (4ag).** 48 mg (48%), brown solid, mp 100–102 °C (lit.<sup>[4]</sup> 103 °C).  $^1\text{H}$  NMR (400 MHz,  $\text{CDCl}_3$ )  $\delta$  7.89-7.87 (m, 2H), 7.44-7.41 (m, 2H), 7.34-7.26 (m, 1H), 5.84 (t,  $J$  = 3.0 Hz, 1H), 3.09-3.07 (m, 2H), 2.99-2.96 (m, 2H);  $^{13}\text{C}$  NMR (100 MHz,  $\text{CDCl}_3$ )  $\delta$  172.6, 161.6, 153.9, 130.5, 128.7, 128.1, 127.0, 116.3, 112.4, 33.5, 25.4.

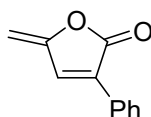

**3-Phenyl-5-methylene-furan-2(5H)-one (4ah).** 39 mg (45%), white solid, mp 68–70 °C; IR (KBr)  $\nu$  3324, 1763  $\text{cm}^{-1}$ ;  $^1\text{H}$  NMR (400 MHz,  $\text{CDCl}_3$ )  $\delta$  7.91-7.89 (m, 2H), 7.51 (s, 1H), 7.45-7.39 (m, 3H), 5.23 (d,  $J$  = 2.5 Hz, 1H), 4.94 (d,  $J$  = 2.6 Hz, 1H);  $^{13}\text{C}$  NMR (100 MHz,  $\text{CDCl}_3$ )  $\delta$  168.4, 153.4, 134.3, 131.9, 129.9, 128.9, 128.7, 127.2, 97.4. HRMS  $m/z$  (ESI) calcd for  $\text{C}_{11}\text{H}_8\text{O}_2$ , (M+H) $^+$  173.0597; found 173.0597.

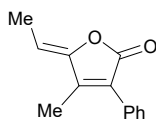

**(Z)-5-ethylidene-4-methyl-3-phenylfuran-2(5H)-one (4ai).**<sup>[5]</sup> 39 mg (39%), colorless oil; IR (KBr)  $\nu$  3324, 1763  $\text{cm}^{-1}$ ;  $^1\text{H}$  NMR (400 MHz,  $\text{CDCl}_3$ )  $\delta$  7.54-7.51 (m, 2H), 7.46-7.42 (m, 2H), 7.39-7.35 (m, 1H), 5.45 (q,  $J = 7.4$  Hz, 1H), 2.23 (s, 3H), 2.00 (d,  $J = 7.4$  Hz, 3H);  $^{13}\text{C}$  NMR (100 MHz,  $\text{CDCl}_3$ )  $\delta$  169.0, 150.6, 146.6, 129.9, 129.0, 128.5, 128.4, 126.3, 107.7, 11.8, 10.8. HRMS  $m/z$  (ESI) calcd for  $\text{C}_{13}\text{H}_{12}\text{O}_2$ , (M+H)<sup>+</sup> 201.0910; found 201.0910.

### 3. X-ray crystallographic data of 3af

**Sample preparation:** Single crystals of **3af** for X-ray diffraction experiment was obtained by slow evaporation of DCM/n-hexane (1:10, v/v) solution containing **3af**. CCDC 2182801 contain the supplementary crystallographic data for this paper, these data can be obtained free of charge from the Cambridge Crystallographic Data Center.

**Figure S1. ORTEP Structure of 3af (CCDC 2182801)**

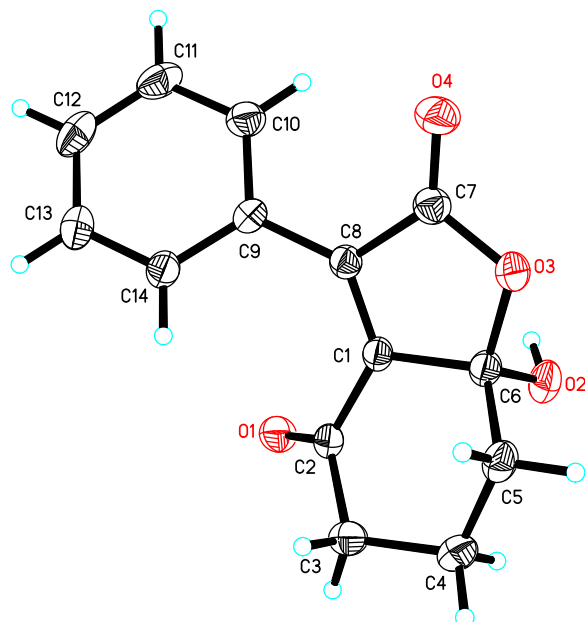

**Table 1. Crystal data and structure refinement for 3af (CCDC 2182801).**

|                     |         |
|---------------------|---------|
| Identification code | cd16656 |
|---------------------|---------|

|                                   |                                                                                                           |
|-----------------------------------|-----------------------------------------------------------------------------------------------------------|
| Empirical formula                 | C <sub>14</sub> H <sub>12</sub> O <sub>4</sub>                                                            |
| Formula weight                    | 244.24                                                                                                    |
| Temperature                       | 293(2) K                                                                                                  |
| Wavelength                        | 0.71073 Å                                                                                                 |
| Crystal system                    | Monoclinic                                                                                                |
| Space group                       | P 21/c                                                                                                    |
| Unit cell dimensions              | a = 9.9657(16) Å      α = 90°.<br>b = 14.300(2) Å      β = 114.989(3)°.<br>c = 9.0367(14) Å      γ = 90°. |
| Volume                            | 1167.3(3) Å <sup>3</sup>                                                                                  |
| Z                                 | 4                                                                                                         |
| Density (calculated)              | 1.390 Mg/m <sup>3</sup>                                                                                   |
| Absorption coefficient            | 0.102 mm <sup>-1</sup>                                                                                    |
| F(000)                            | 512                                                                                                       |
| Crystal size                      | 0.200 x 0.170 x 0.120 mm <sup>3</sup>                                                                     |
| Theta range for data collection   | 2.255 to 25.498°.                                                                                         |
| Index ranges                      | -12 ≤ h ≤ 10, -17 ≤ k ≤ 13, -9 ≤ l ≤ 10                                                                   |
| Reflections collected             | 6549                                                                                                      |
| Independent reflections           | 2170 [R(int) = 0.0336]                                                                                    |
| Completeness to theta = 25.242°   | 100.0 %                                                                                                   |
| Absorption correction             | Semi-empirical from equivalents                                                                           |
| Max. and min. transmission        | 0.7456 and 0.6282                                                                                         |
| Refinement method                 | Full-matrix least-squares on F <sup>2</sup>                                                               |
| Data / restraints / parameters    | 2170 / 0 / 164                                                                                            |
| Goodness-of-fit on F <sup>2</sup> | 1.049                                                                                                     |
| Final R indices [I > 2σ(I)]       | R1 = 0.0481, wR2 = 0.1217                                                                                 |
| R indices (all data)              | R1 = 0.0625, wR2 = 0.1302                                                                                 |
| Extinction coefficient            | n/a                                                                                                       |
| Largest diff. peak and hole       | 0.704 and -0.152 e.Å <sup>-3</sup>                                                                        |

**Table 2. Atomic coordinates (  $\times 10^4$ ) and equivalent isotropic displacement parameters ( $\text{\AA}^2 \times 10^3$ ) for 3af (CCDC 2182801).  $U(\text{eq})$  is defined as one third of the trace of the orthogonalized  $U_{ij}$  tensor.**

|       | x        | y       | z       | $U(\text{eq})$ |
|-------|----------|---------|---------|----------------|
| O(1)  | 5548(2)  | -567(1) | 3083(2) | 49(1)          |
| O(2)  | 2246(2)  | 593(1)  | 3662(2) | 49(1)          |
| O(3)  | 3099(2)  | 2089(1) | 3663(2) | 47(1)          |
| O(4)  | 5011(2)  | 2986(1) | 5217(2) | 57(1)          |
| C(1)  | 4439(2)  | 879(1)  | 3231(2) | 34(1)          |
| C(2)  | 4575(2)  | 6(2)    | 2417(2) | 38(1)          |
| C(3)  | 3441(2)  | -90(2)  | 686(3)  | 49(1)          |
| C(4)  | 1898(2)  | 235(2)  | 406(3)  | 51(1)          |
| C(5)  | 1897(2)  | 1198(2) | 1118(2) | 45(1)          |
| C(6)  | 2892(2)  | 1174(1) | 2918(2) | 38(1)          |
| C(7)  | 4565(2)  | 2286(2) | 4439(2) | 41(1)          |
| C(8)  | 5429(2)  | 1512(1) | 4131(2) | 35(1)          |
| C(9)  | 7045(2)  | 1537(1) | 4723(2) | 36(1)          |
| C(10) | 7931(2)  | 1912(2) | 6249(3) | 49(1)          |
| C(11) | 9449(3)  | 1899(2) | 6823(3) | 59(1)          |
| C(12) | 10113(2) | 1512(2) | 5908(3) | 59(1)          |
| C(13) | 9249(2)  | 1154(2) | 4394(3) | 51(1)          |
| C(14) | 7730(2)  | 1167(2) | 3804(3) | 42(1)          |

**Table 3. Bond lengths [Å] and angles [°] for 3af (CCDC 2182801).**

---

|                |            |
|----------------|------------|
| O(1)-C(2)      | 1.216(2)   |
| O(2)-C(6)      | 1.386(2)   |
| O(2)-H(2)      | 0.8200     |
| O(3)-C(7)      | 1.357(2)   |
| O(3)-C(6)      | 1.446(2)   |
| O(4)-C(7)      | 1.197(2)   |
| C(1)-C(8)      | 1.332(3)   |
| C(1)-C(2)      | 1.485(3)   |
| C(1)-C(6)      | 1.506(3)   |
| C(2)-C(3)      | 1.500(3)   |
| C(3)-C(4)      | 1.522(3)   |
| C(3)-H(3A)     | 0.9700     |
| C(3)-H(3B)     | 0.9700     |
| C(4)-C(5)      | 1.519(3)   |
| C(4)-H(4A)     | 0.9700     |
| C(4)-H(4B)     | 0.9700     |
| C(5)-C(6)      | 1.506(3)   |
| C(5)-H(5A)     | 0.9700     |
| C(5)-H(5B)     | 0.9700     |
| C(7)-C(8)      | 1.499(3)   |
| C(8)-C(9)      | 1.467(3)   |
| C(9)-C(14)     | 1.384(3)   |
| C(9)-C(10)     | 1.393(3)   |
| C(10)-C(11)    | 1.377(3)   |
| C(10)-H(10)    | 0.9300     |
| C(11)-C(12)    | 1.374(4)   |
| C(11)-H(11)    | 0.9300     |
| C(12)-C(13)    | 1.371(3)   |
| C(12)-H(12)    | 0.9300     |
| C(13)-C(14)    | 1.377(3)   |
| C(13)-H(13)    | 0.9300     |
| C(14)-H(14)    | 0.9300     |
| <br>           |            |
| C(6)-O(2)-H(2) | 109.5      |
| C(7)-O(3)-C(6) | 109.79(15) |
| C(8)-C(1)-C(2) | 132.40(18) |

|                  |            |
|------------------|------------|
| C(8)-C(1)-C(6)   | 111.10(17) |
| C(2)-C(1)-C(6)   | 116.33(16) |
| O(1)-C(2)-C(1)   | 122.78(18) |
| O(1)-C(2)-C(3)   | 123.14(19) |
| C(1)-C(2)-C(3)   | 114.04(17) |
| C(2)-C(3)-C(4)   | 114.14(18) |
| C(2)-C(3)-H(3A)  | 108.7      |
| C(4)-C(3)-H(3A)  | 108.7      |
| C(2)-C(3)-H(3B)  | 108.7      |
| C(4)-C(3)-H(3B)  | 108.7      |
| H(3A)-C(3)-H(3B) | 107.6      |
| C(5)-C(4)-C(3)   | 112.80(18) |
| C(5)-C(4)-H(4A)  | 109.0      |
| C(3)-C(4)-H(4A)  | 109.0      |
| C(5)-C(4)-H(4B)  | 109.0      |
| C(3)-C(4)-H(4B)  | 109.0      |
| H(4A)-C(4)-H(4B) | 107.8      |
| C(6)-C(5)-C(4)   | 108.65(18) |
| C(6)-C(5)-H(5A)  | 110.0      |
| C(4)-C(5)-H(5A)  | 110.0      |
| C(6)-C(5)-H(5B)  | 110.0      |
| C(4)-C(5)-H(5B)  | 110.0      |
| H(5A)-C(5)-H(5B) | 108.3      |
| O(2)-C(6)-O(3)   | 108.70(16) |
| O(2)-C(6)-C(1)   | 112.92(17) |
| O(3)-C(6)-C(1)   | 103.47(15) |
| O(2)-C(6)-C(5)   | 107.96(16) |
| O(3)-C(6)-C(5)   | 112.46(17) |
| C(1)-C(6)-C(5)   | 111.34(16) |
| O(4)-C(7)-O(3)   | 121.88(19) |
| O(4)-C(7)-C(8)   | 128.90(19) |
| O(3)-C(7)-C(8)   | 109.22(17) |
| C(1)-C(8)-C(9)   | 130.94(18) |
| C(1)-C(8)-C(7)   | 106.20(17) |
| C(9)-C(8)-C(7)   | 122.84(17) |
| C(14)-C(9)-C(10) | 118.30(19) |
| C(14)-C(9)-C(8)  | 121.04(17) |
| C(10)-C(9)-C(8)  | 120.64(18) |



|                   |          |
|-------------------|----------|
| C(11)-C(10)-C(9)  | 120.2(2) |
| C(11)-C(10)-H(10) | 119.9    |
| C(9)-C(10)-H(10)  | 119.9    |
| C(12)-C(11)-C(10) | 120.7(2) |
| C(12)-C(11)-H(11) | 119.6    |
| C(10)-C(11)-H(11) | 119.6    |
| C(13)-C(12)-C(11) | 119.5(2) |
| C(13)-C(12)-H(12) | 120.3    |
| C(11)-C(12)-H(12) | 120.3    |
| C(12)-C(13)-C(14) | 120.3(2) |
| C(12)-C(13)-H(13) | 119.8    |
| C(14)-C(13)-H(13) | 119.8    |
| C(13)-C(14)-C(9)  | 120.9(2) |
| C(13)-C(14)-H(14) | 119.5    |
| C(9)-C(14)-H(14)  | 119.5    |

---

Symmetry transformations used to generate equivalent atoms:

**Table 4.** Anisotropic displacement parameters ( $\text{\AA}^2 \times 10^3$ ) for 3af (CCDC 2182801).

The anisotropic displacement factor exponent takes the form:  $-2\pi^2 [ h^2 a^{*2} U^{11} + \dots + 2 h k a^* b^* U^{12} ]$

|      | U <sup>11</sup> | U <sup>22</sup> | U <sup>33</sup> | U <sup>23</sup> | U <sup>13</sup> | U <sup>12</sup> |
|------|-----------------|-----------------|-----------------|-----------------|-----------------|-----------------|
| O(1) | 44(1)           | 48(1)           | 50(1)           | -5(1)           | 14(1)           | 10(1)           |
| O(2) | 37(1)           | 62(1)           | 51(1)           | 7(1)            | 23(1)           | -1(1)           |
| O(3) | 36(1)           | 46(1)           | 55(1)           | -7(1)           | 17(1)           | 7(1)            |
| O(4) | 57(1)           | 44(1)           | 64(1)           | -13(1)          | 21(1)           | 1(1)            |
| C(1) | 29(1)           | 40(1)           | 33(1)           | 2(1)            | 14(1)           | 2(1)            |
| C(2) | 32(1)           | 41(1)           | 42(1)           | -3(1)           | 18(1)           | -1(1)           |
| C(3) | 43(1)           | 55(1)           | 44(1)           | -11(1)          | 13(1)           | 2(1)            |
| C(4) | 38(1)           | 60(1)           | 43(1)           | -6(1)           | 7(1)            | 0(1)            |
| C(5) | 32(1)           | 53(1)           | 45(1)           | 5(1)            | 12(1)           | 5(1)            |
| C(6) | 32(1)           | 38(1)           | 45(1)           | -2(1)           | 16(1)           | 0(1)            |
| C(7) | 42(1)           | 39(1)           | 42(1)           | -1(1)           | 16(1)           | 2(1)            |
| C(8) | 34(1)           | 40(1)           | 32(1)           | 1(1)            | 14(1)           | 1(1)            |

|       |       |       |       |       |       |       |
|-------|-------|-------|-------|-------|-------|-------|
| C(9)  | 32(1) | 37(1) | 36(1) | 3(1)  | 12(1) | -2(1) |
| C(10) | 44(1) | 50(1) | 46(1) | -7(1) | 13(1) | -1(1) |
| C(11) | 41(1) | 59(2) | 56(1) | -6(1) | 1(1)  | -7(1) |
| C(12) | 31(1) | 57(2) | 78(2) | 9(1)  | 12(1) | -2(1) |
| C(13) | 40(1) | 54(1) | 65(2) | 5(1)  | 27(1) | 1(1)  |
| C(14) | 36(1) | 49(1) | 42(1) | 1(1)  | 17(1) | -3(1) |

**Table 5. Hydrogen coordinates ( $\times 10^4$ ) and isotropic displacement parameters ( $\text{\AA}^2 \times 10^3$ ) for 3af (CCDC 2182801).**

|       | x     | y    | z    | U(eq) |
|-------|-------|------|------|-------|
| H(2)  | 2827  | 507  | 4616 | 73    |
| H(3A) | 3388  | -742 | 365  | 59    |
| H(3B) | 3764  | 268  | -16  | 59    |
| H(4A) | 1274  | 249  | -758 | 61    |
| H(4B) | 1474  | -212 | 896  | 61    |
| H(5A) | 2252  | 1660 | 583  | 54    |
| H(5B) | 899   | 1367 | 946  | 54    |
| H(10) | 7495  | 2173 | 6882 | 59    |
| H(11) | 10032 | 2154 | 7840 | 71    |
| H(12) | 11139 | 1494 | 6313 | 71    |
| H(13) | 9693  | 900  | 3763 | 61    |
| H(14) | 7156  | 924  | 2774 | 51    |

**Table 6. Torsion angles [°] for 3af (CCDC 2182801).**

---

|                        |             |
|------------------------|-------------|
| C(8)-C(1)-C(2)-O(1)    | 44.9(3)     |
| C(6)-C(1)-C(2)-O(1)    | -140.4(2)   |
| C(8)-C(1)-C(2)-C(3)    | -133.1(2)   |
| C(6)-C(1)-C(2)-C(3)    | 41.6(2)     |
| O(1)-C(2)-C(3)-C(4)    | 142.0(2)    |
| C(1)-C(2)-C(3)-C(4)    | -39.9(3)    |
| C(2)-C(3)-C(4)-C(5)    | 49.3(3)     |
| C(3)-C(4)-C(5)-C(6)    | -57.6(2)    |
| C(7)-O(3)-C(6)-O(2)    | 115.56(17)  |
| C(7)-O(3)-C(6)-C(1)    | -4.7(2)     |
| C(7)-O(3)-C(6)-C(5)    | -124.95(17) |
| C(8)-C(1)-C(6)-O(2)    | -113.82(19) |
| C(2)-C(1)-C(6)-O(2)    | 70.3(2)     |
| C(8)-C(1)-C(6)-O(3)    | 3.5(2)      |
| C(2)-C(1)-C(6)-O(3)    | -172.32(16) |
| C(8)-C(1)-C(6)-C(5)    | 124.54(19)  |
| C(2)-C(1)-C(6)-C(5)    | -51.3(2)    |
| C(4)-C(5)-C(6)-O(2)    | -67.0(2)    |
| C(4)-C(5)-C(6)-O(3)    | 173.11(16)  |
| C(4)-C(5)-C(6)-C(1)    | 57.5(2)     |
| C(6)-O(3)-C(7)-O(4)    | -176.08(19) |
| C(6)-O(3)-C(7)-C(8)    | 4.3(2)      |
| C(2)-C(1)-C(8)-C(9)    | -4.3(4)     |
| C(6)-C(1)-C(8)-C(9)    | -179.26(18) |
| C(2)-C(1)-C(8)-C(7)    | 173.9(2)    |
| C(6)-C(1)-C(8)-C(7)    | -1.1(2)     |
| O(4)-C(7)-C(8)-C(1)    | 178.4(2)    |
| O(3)-C(7)-C(8)-C(1)    | -2.0(2)     |
| O(4)-C(7)-C(8)-C(9)    | -3.2(3)     |
| O(3)-C(7)-C(8)-C(9)    | 176.40(17)  |
| C(1)-C(8)-C(9)-C(14)   | 33.9(3)     |
| C(7)-C(8)-C(9)-C(14)   | -144.0(2)   |
| C(1)-C(8)-C(9)-C(10)   | -144.3(2)   |
| C(7)-C(8)-C(9)-C(10)   | 37.8(3)     |
| C(14)-C(9)-C(10)-C(11) | -0.9(3)     |
| C(8)-C(9)-C(10)-C(11)  | 177.4(2)    |

|                         |             |
|-------------------------|-------------|
| C(9)-C(10)-C(11)-C(12)  | -0.3(4)     |
| C(10)-C(11)-C(12)-C(13) | 1.3(4)      |
| C(11)-C(12)-C(13)-C(14) | -1.0(4)     |
| C(12)-C(13)-C(14)-C(9)  | -0.3(3)     |
| C(10)-C(9)-C(14)-C(13)  | 1.2(3)      |
| C(8)-C(9)-C(14)-C(13)   | -177.06(19) |

---

Symmetry transformations used to generate equivalent atoms:

**Table 7. Hydrogen bonds for 3af (CCDC 2182801) [ $\text{\AA}$  and  $^\circ$ ].**

| D-H...A             | d(D-H) | d(H...A) | d(D...A) | $\angle(\text{DHA})$ |
|---------------------|--------|----------|----------|----------------------|
| C(3)-H(3A)...O(4)#1 | 0.97   | 2.62     | 3.417(3) | 140.1                |
| O(2)-H(2)...O(1)#2  | 0.82   | 2.03     | 2.833(2) | 167.4                |

Symmetry transformations used to generate equivalent atoms:

#1 -x+1,y-1/2,-z+1/2    #2 -x+1,-y,-z+1

## 4. Reference

- [1] W. Kuldeep, C. Yang, P. R. West, K. C. Deming, S. R. Chemburkar and R. E. Reddy, *Synth. Commun.*, 2008, **38**, 4434–4444.
- [2] S. K. Bagal, R. M. Adlington, J. E. Baldwin and R. Marquez, *J. Org. Chem.*, 2004, **69**, 9100-9108.
- [3] H. Rudler, A. Parlier, T. Durand-Réville, B. Martin-Vaca, M. Audouin, E. Garrier, V. Certal and J. Vaissermann, *Tetrahedron*, 2000, **56**, 5001–5027.
- [4] Y. Harada, Y. Fukumoto, N. Chatani, *Org. Lett.*, 2005, **7**, 4385-4387.
- [5] M. N. Palange, R. G. Gonnade and R. Kontham, *Org. Biomol. Chem.*, 2019, **17**, 5749-5759.

## 5. $^1\text{H}$ -NMR and $^{13}\text{C}$ -NMR spectra of compounds 3aa-p and 4aa-i

### $^1\text{H}$ NMR spectrum of 3aa

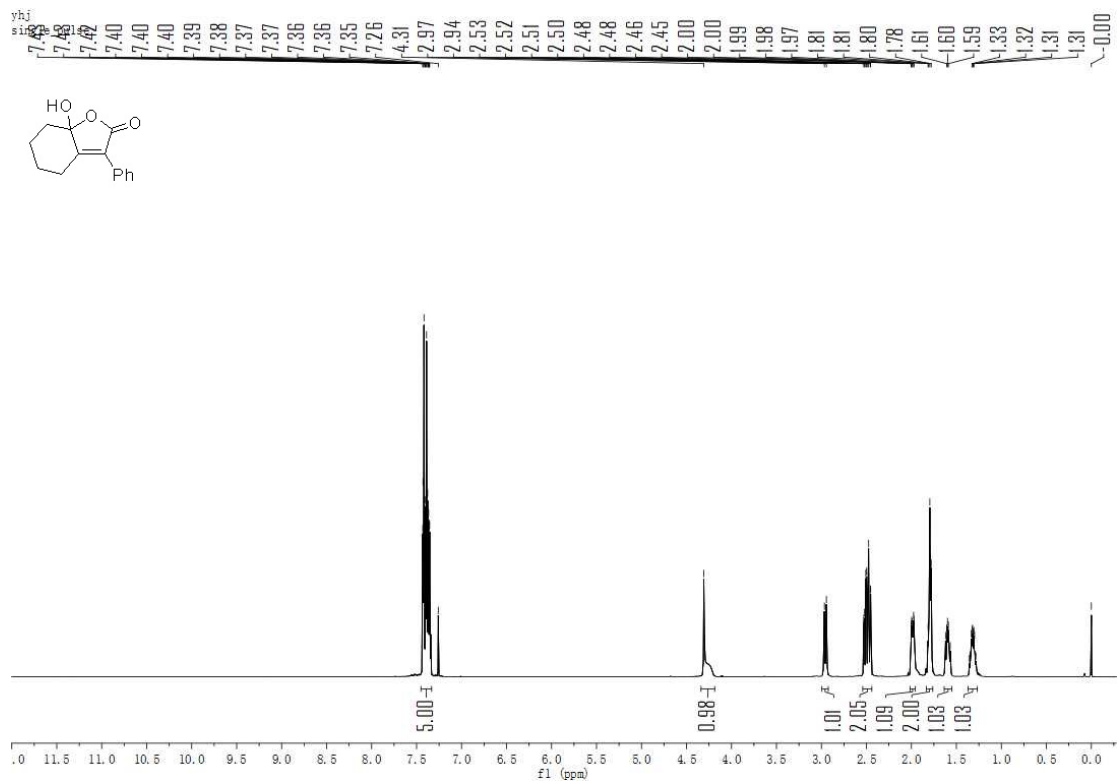

### $^{13}\text{C}$ NMR spectrum of 3aa

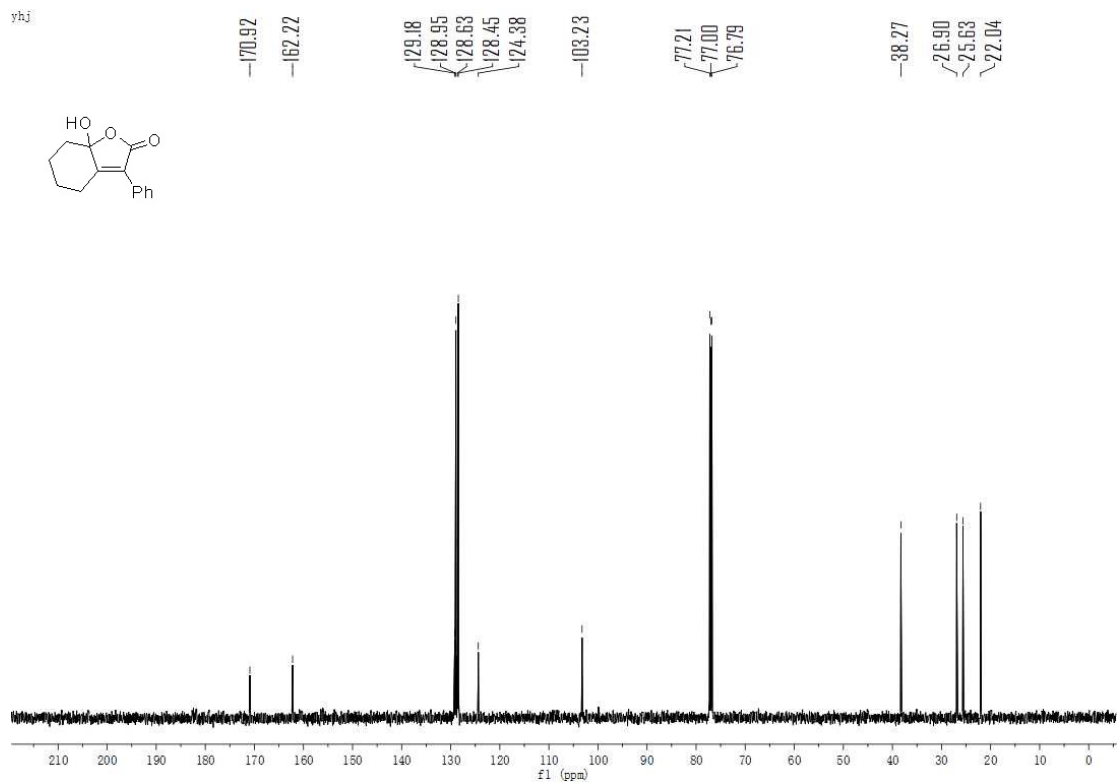

### <sup>1</sup>H NMR spectrum of 3ab

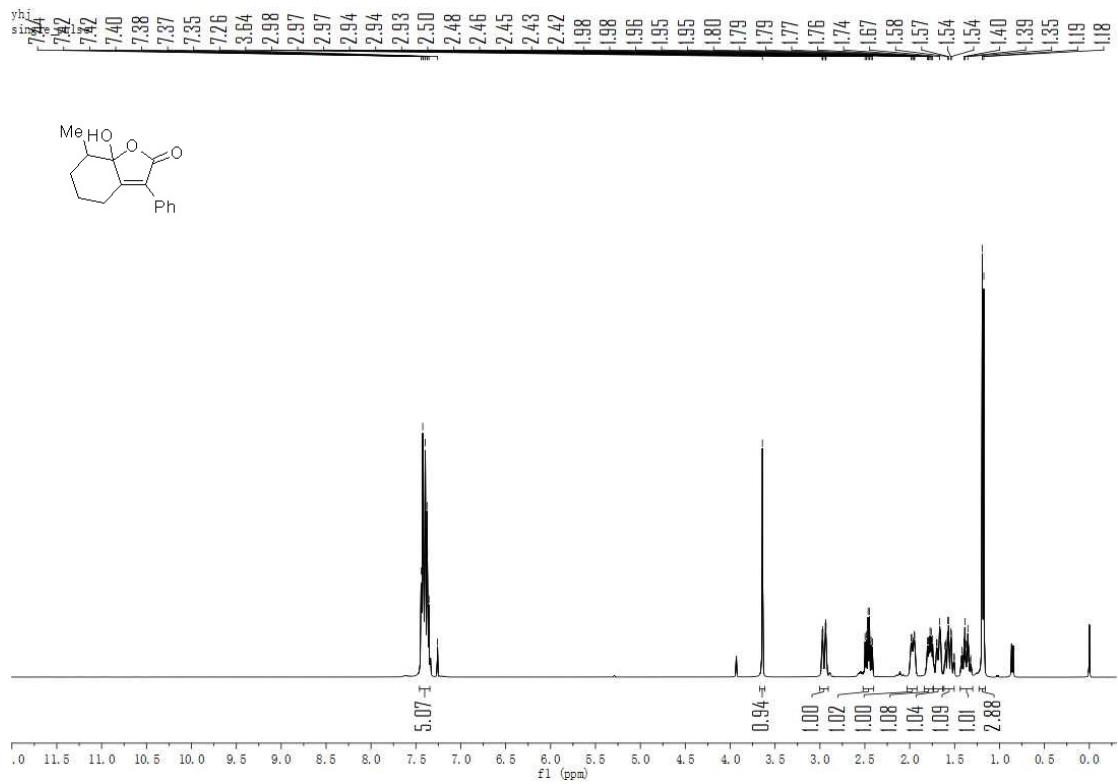

### <sup>13</sup>C NMR spectrum of 3ab

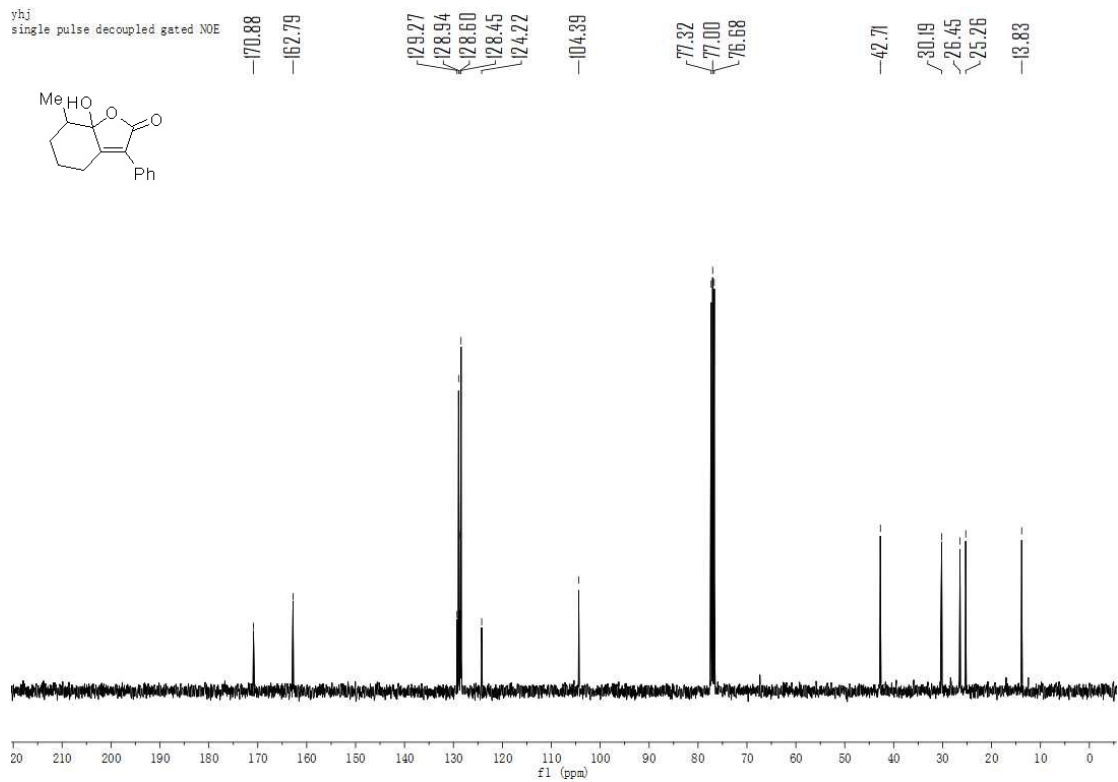

### <sup>1</sup>H NMR spectrum of 3ac

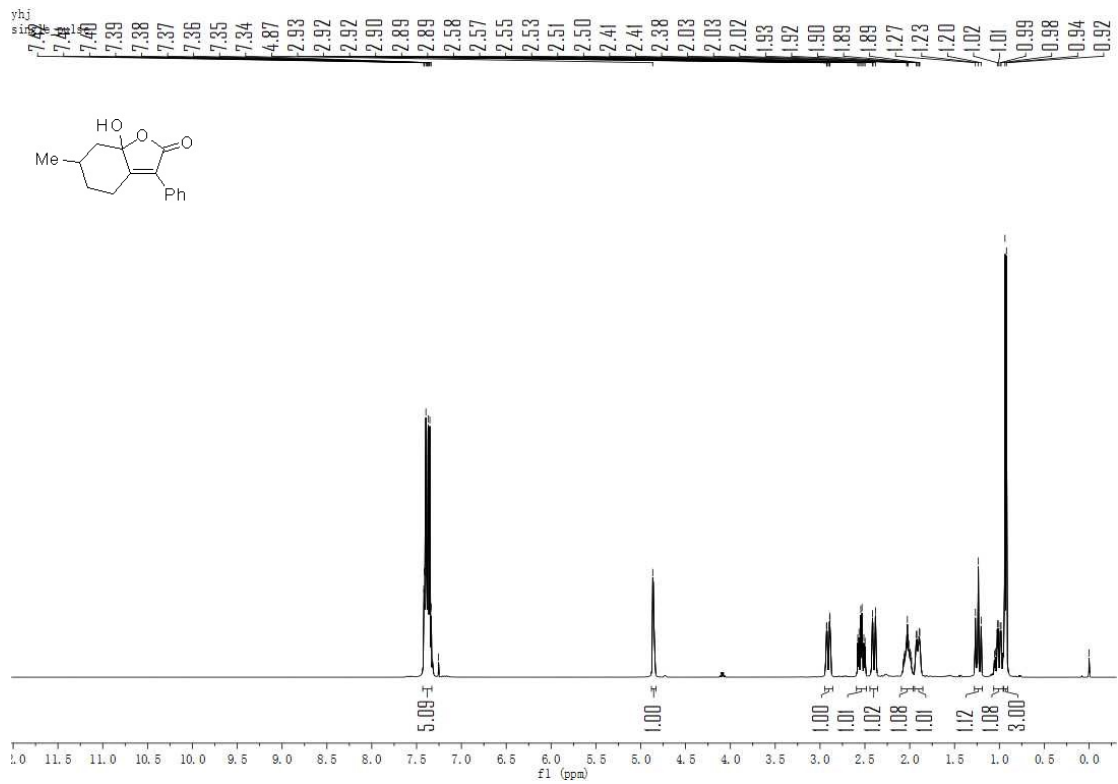

### <sup>13</sup>C NMR spectrum of 3ac

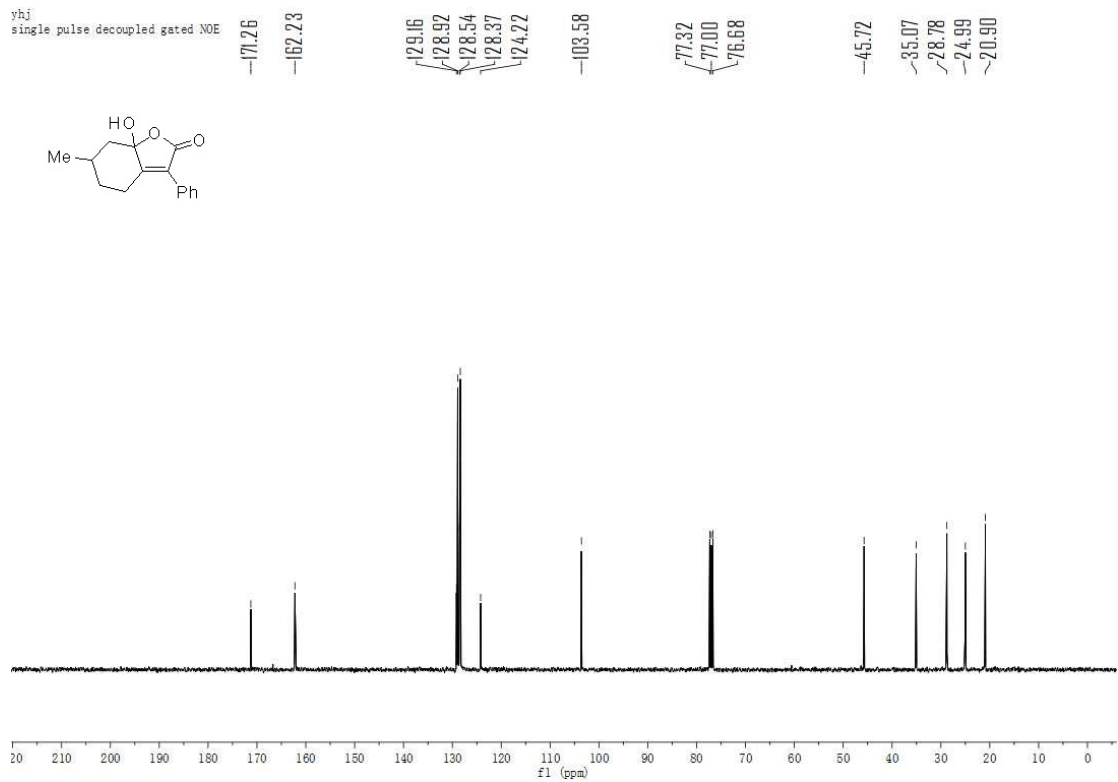

# <sup>1</sup>H NMR spectrum of 3ad

yhj  
single\_pulse

7.40 7.40 7.39 7.38 7.36 7.36 7.35 7.35 7.34 7.34 7.26 4.76 4.73 4.41 4.38 4.38 3.99 3.97 3.96 3.86 3.86 3.83 2.39 2.36 2.08 2.07 2.07 2.05 2.04 2.02 2.02 0.00

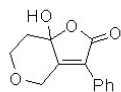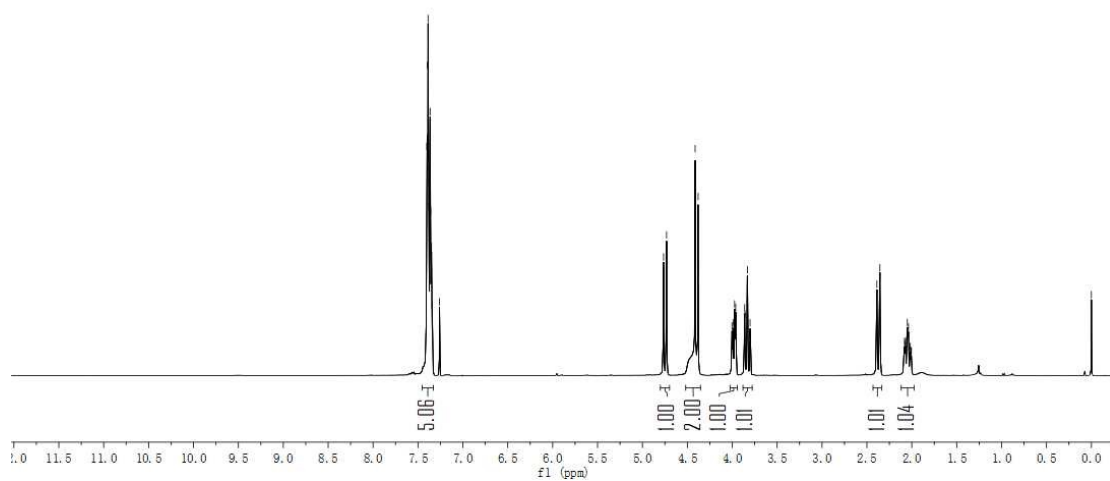

# <sup>13</sup>C NMR spectrum of 3ad

yhj  
single\_pulse decoupled gated NOE

170.26 154.80 129.51 128.93 128.68 128.07 126.08 100.94 77.32 77.00 76.68 64.56 62.75 39.96

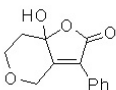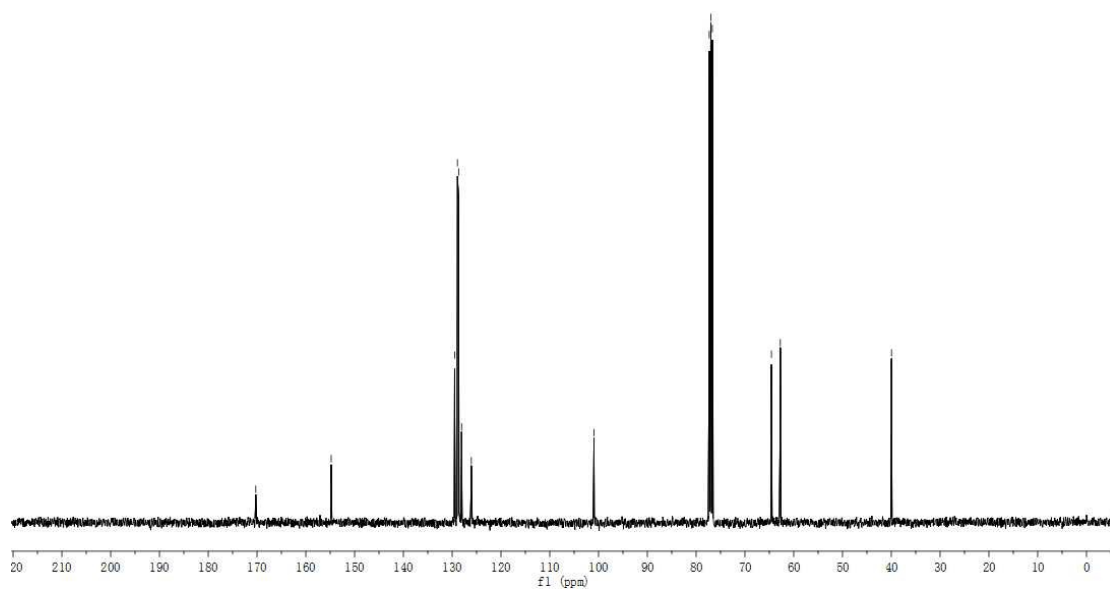



### <sup>1</sup>H NMR spectrum of 3ae

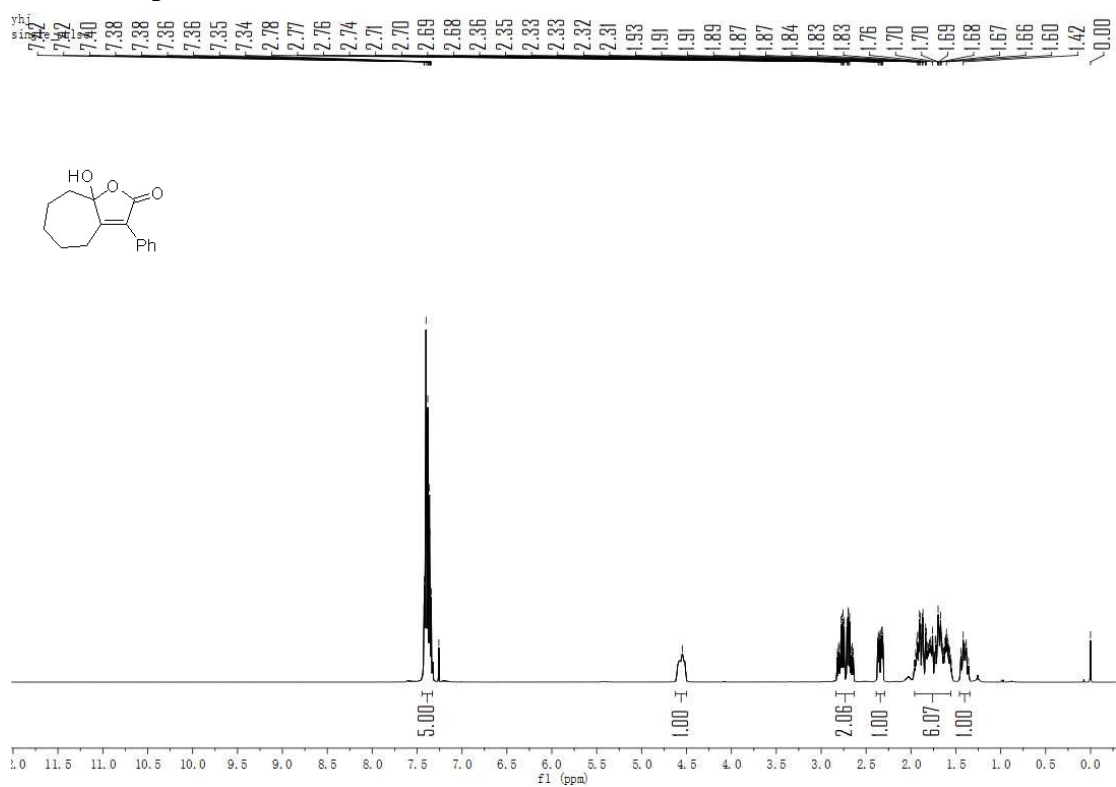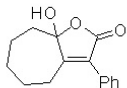

### <sup>13</sup>C NMR spectrum of 3ae

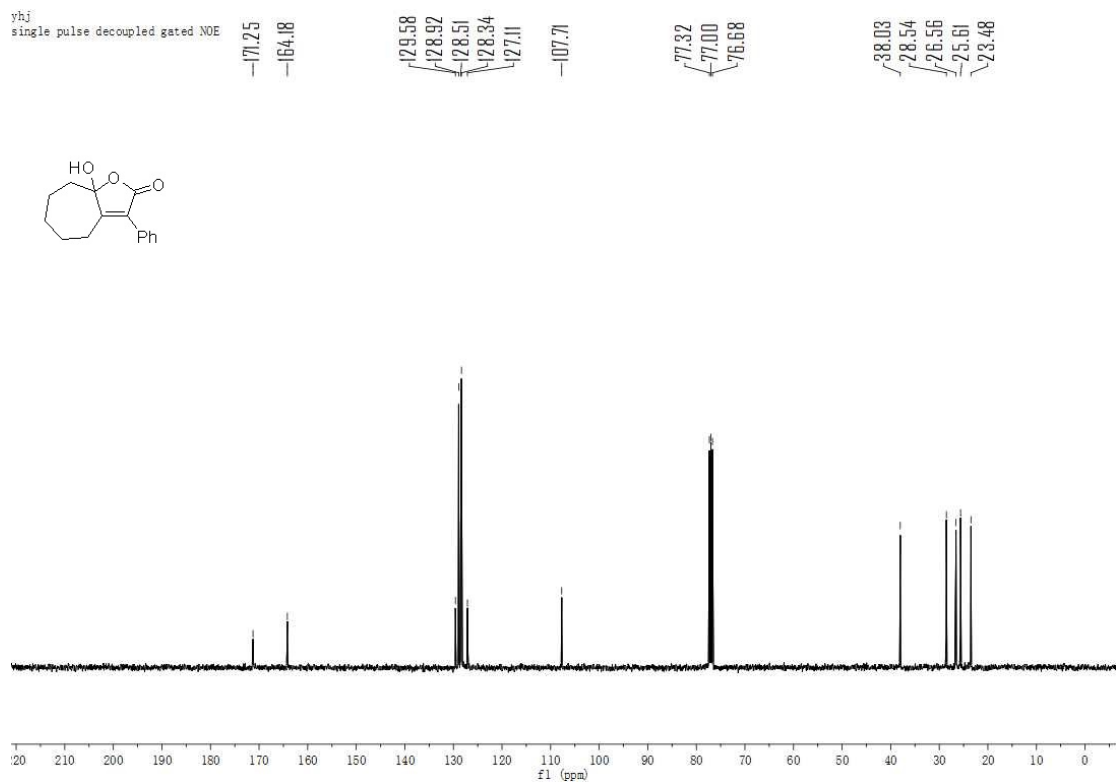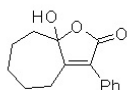

# <sup>1</sup>H NMR spectrum of 3af

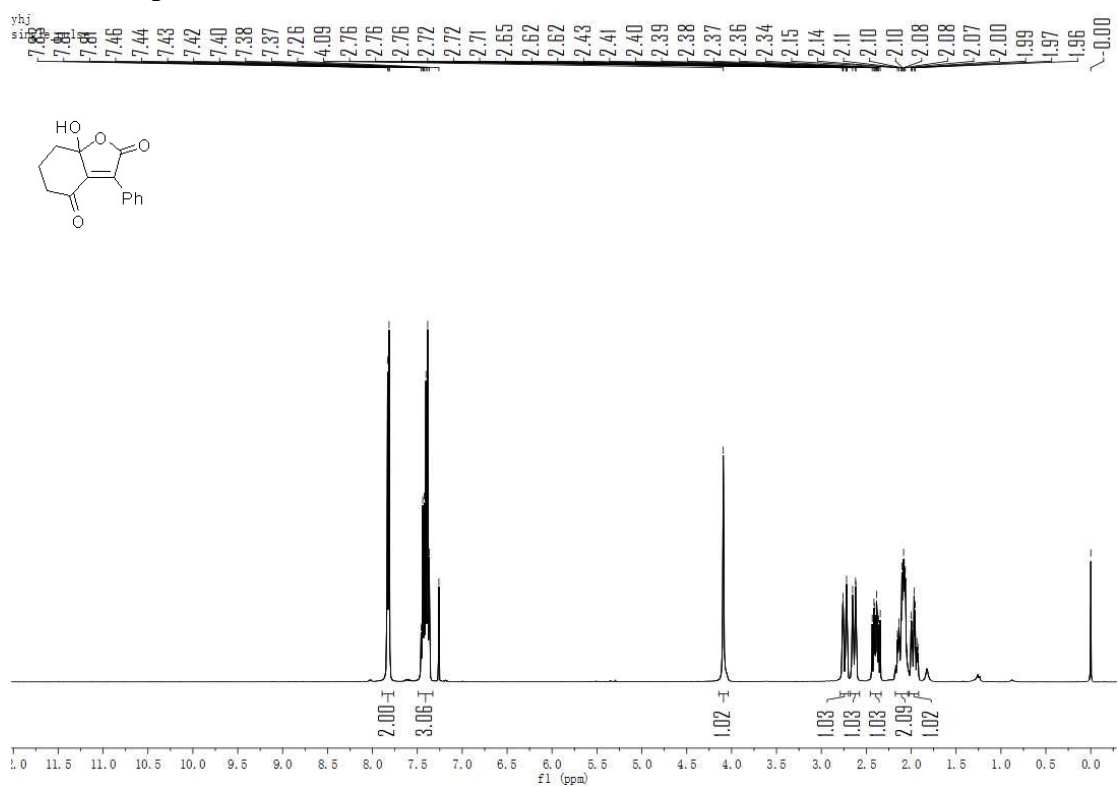

# <sup>13</sup>C NMR spectrum of 3af

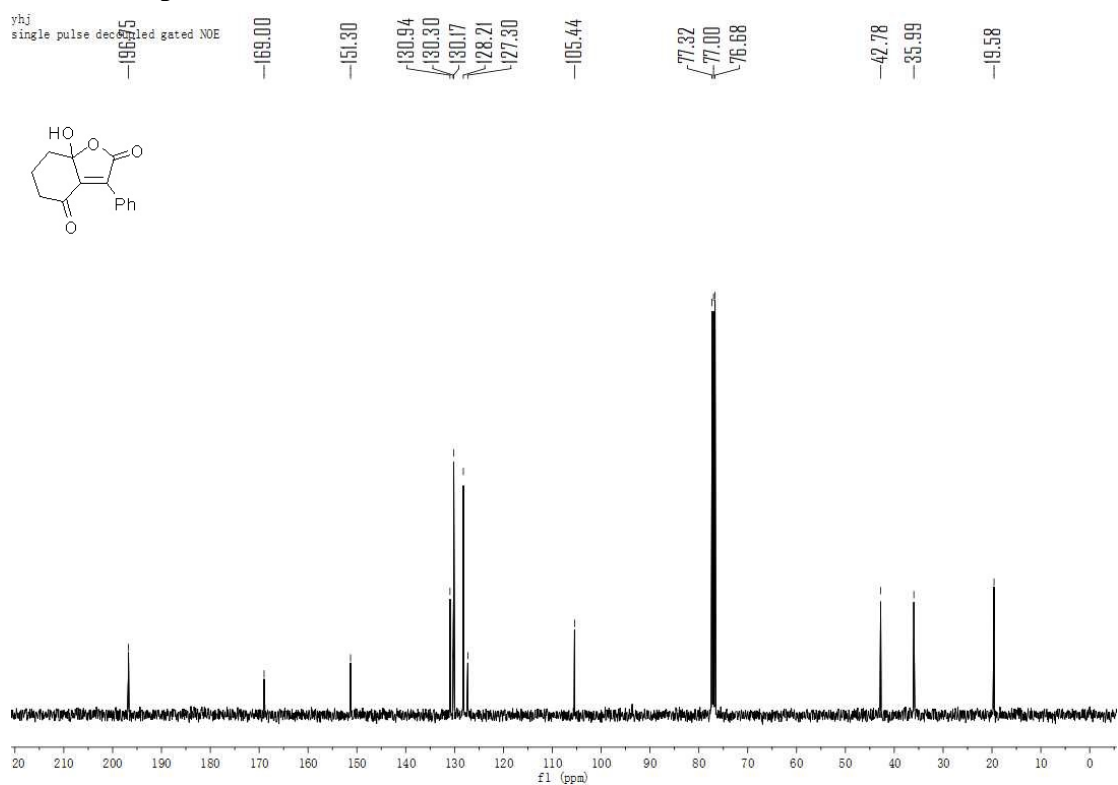

# <sup>1</sup>H NMR spectrum of 3ag

yhj  
single\_pulse

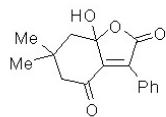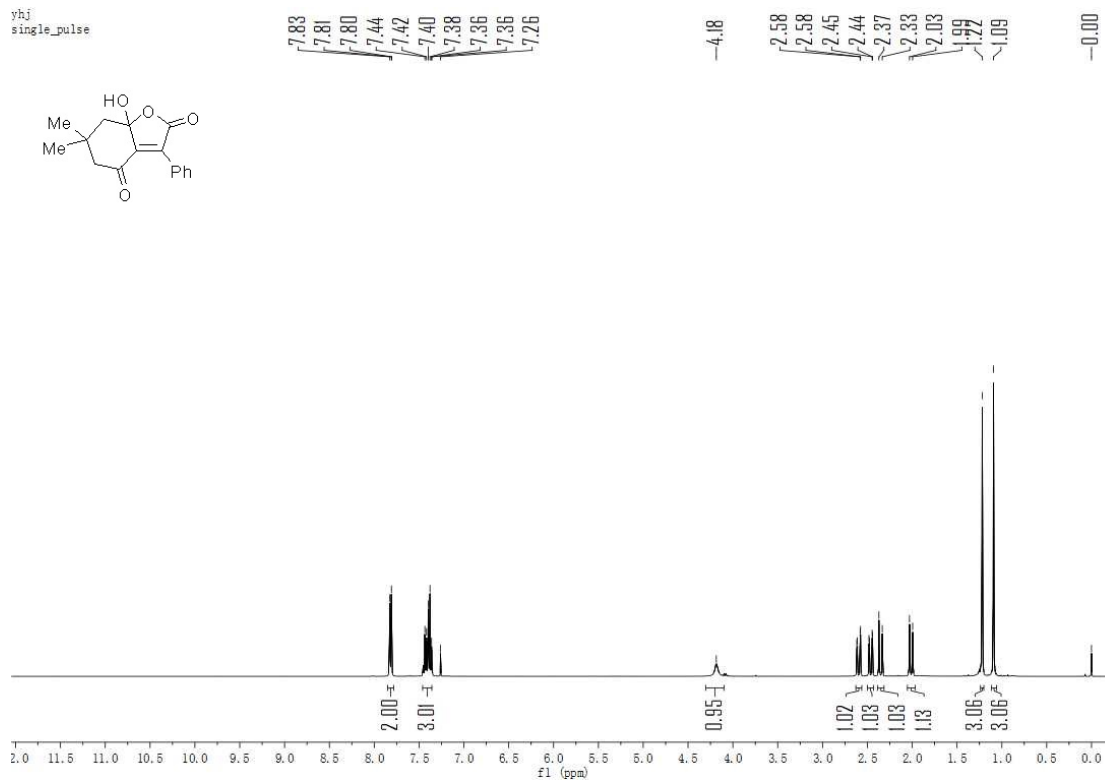

# <sup>13</sup>C NMR spectrum of 3ag

yhj  
single\_pulse decoupled gated NOE

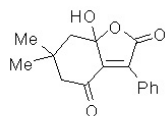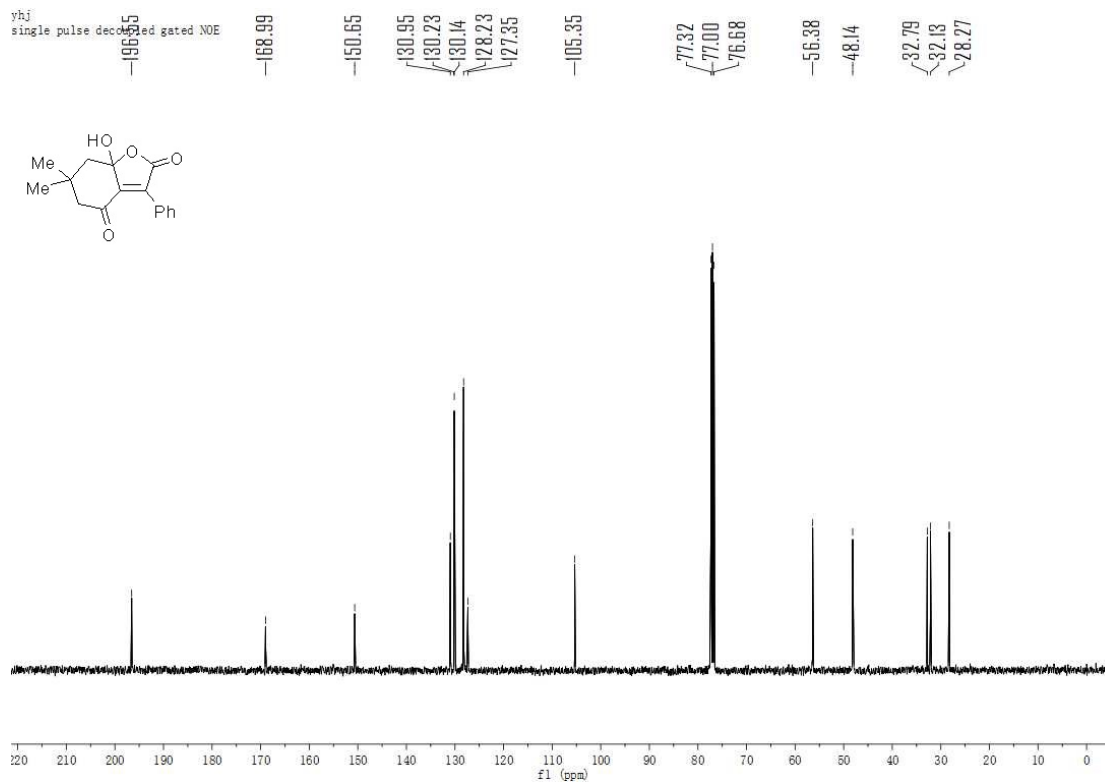

# <sup>1</sup>H NMR spectrum of 3ah

yhj  
single\_pulse

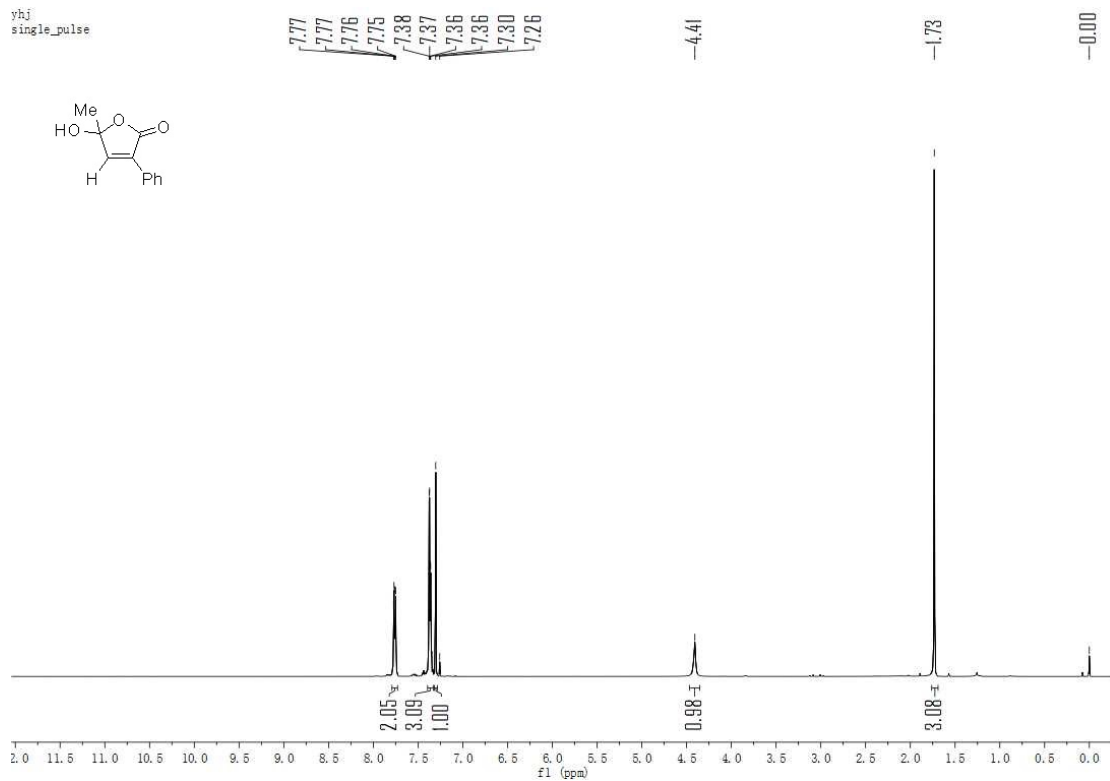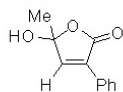

# <sup>13</sup>C NMR spectrum of 3ah

yhj  
single\_pulse decoupled gated NOE

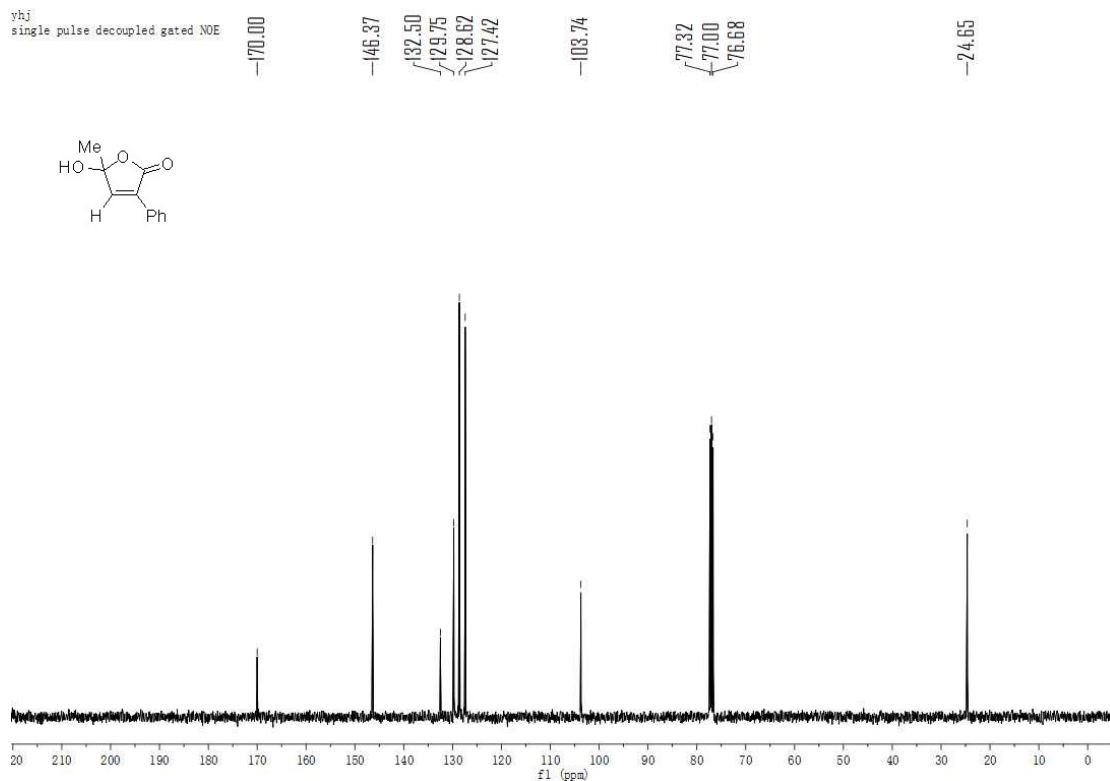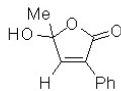

### <sup>1</sup>H NMR spectrum of 3ai

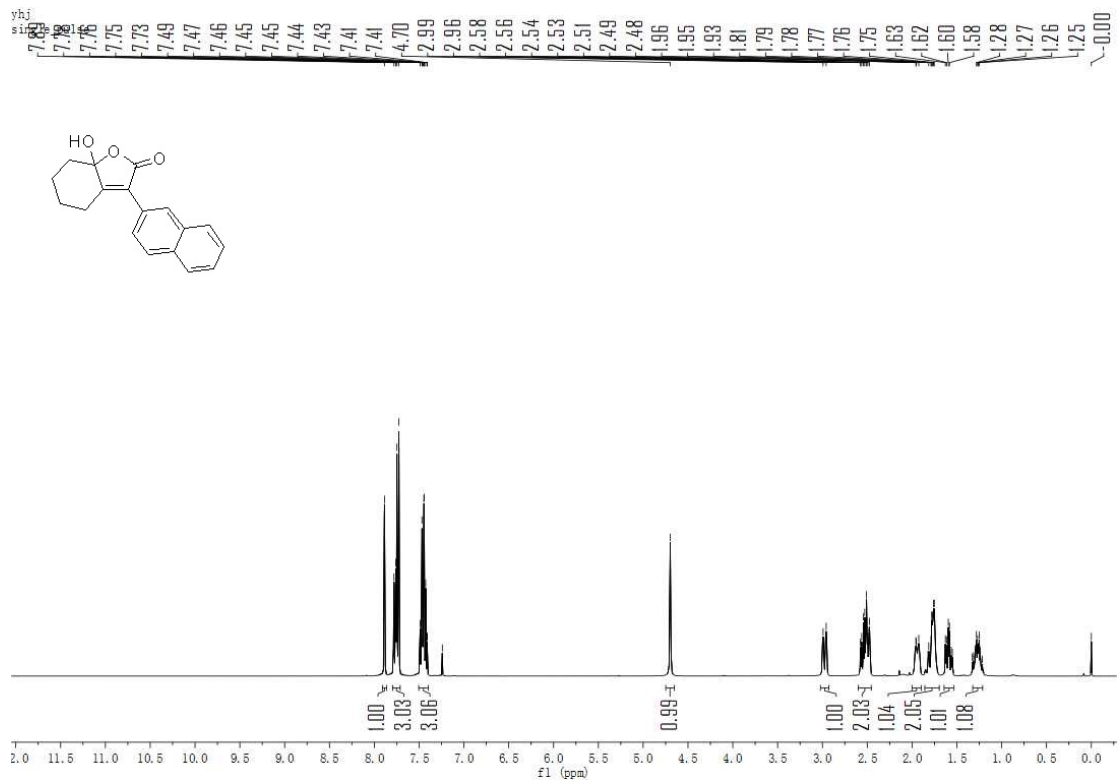

### <sup>13</sup>C NMR spectrum of 3ai

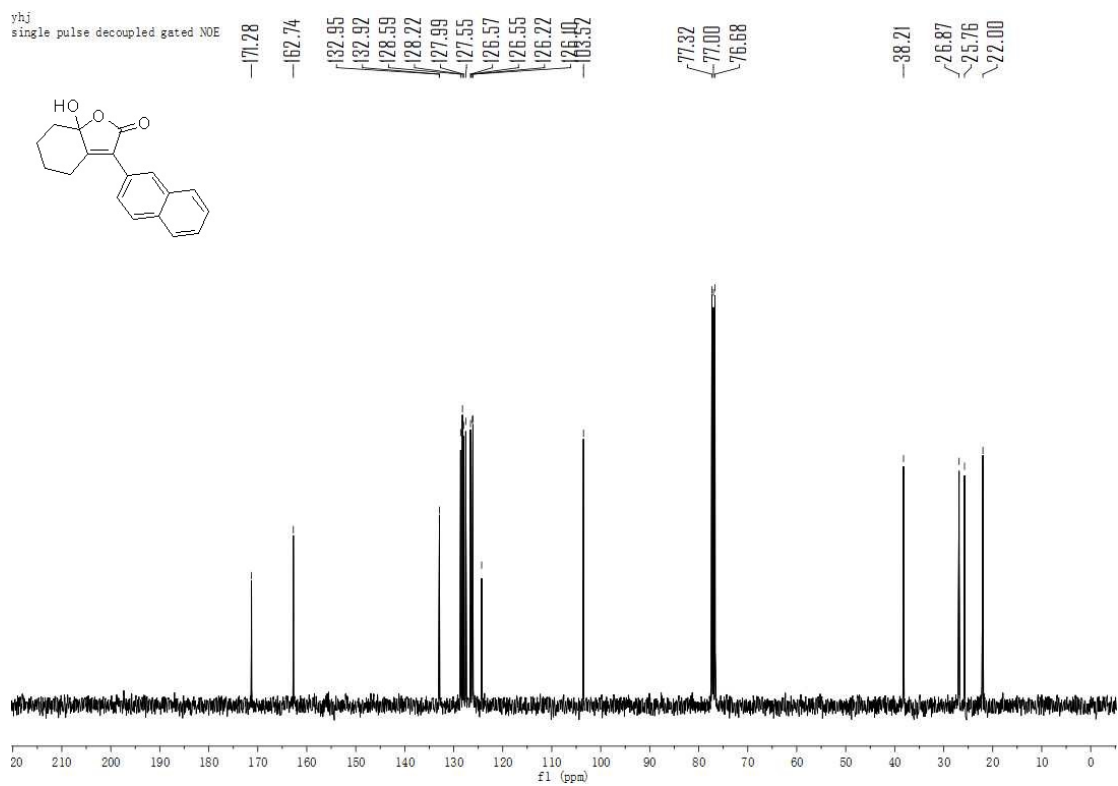

### <sup>1</sup>H NMR spectrum of 3aj

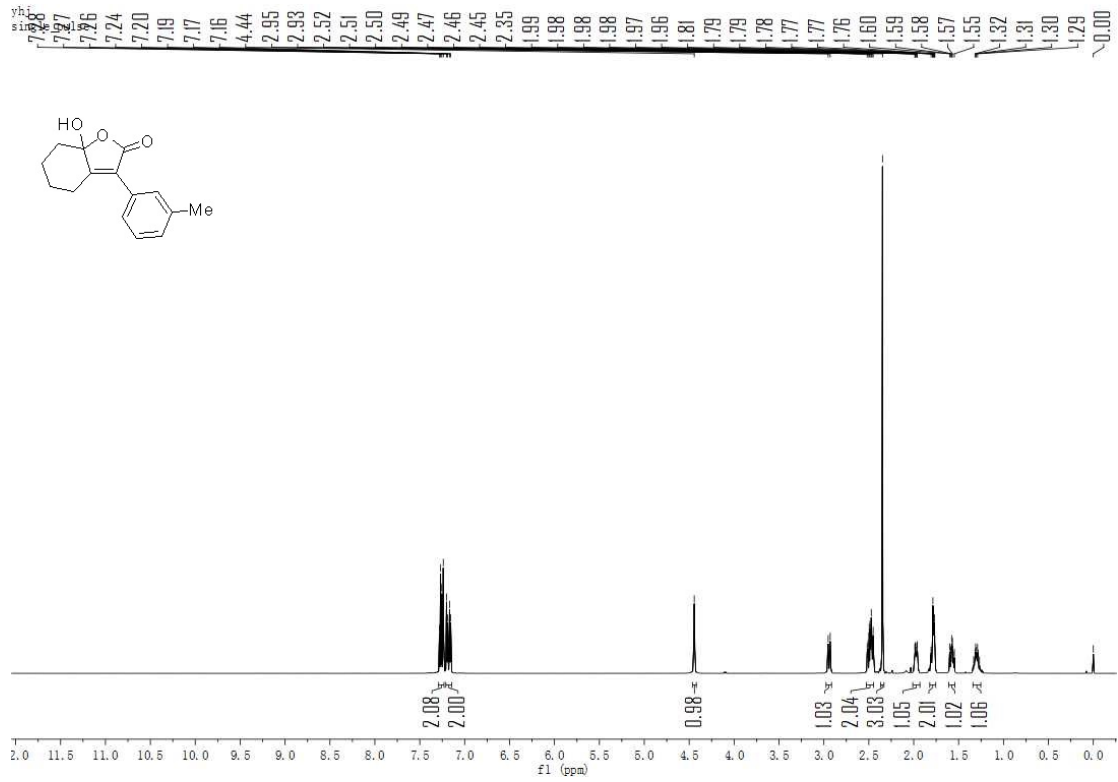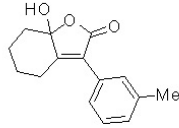

### <sup>13</sup>C NMR spectrum of 3aj

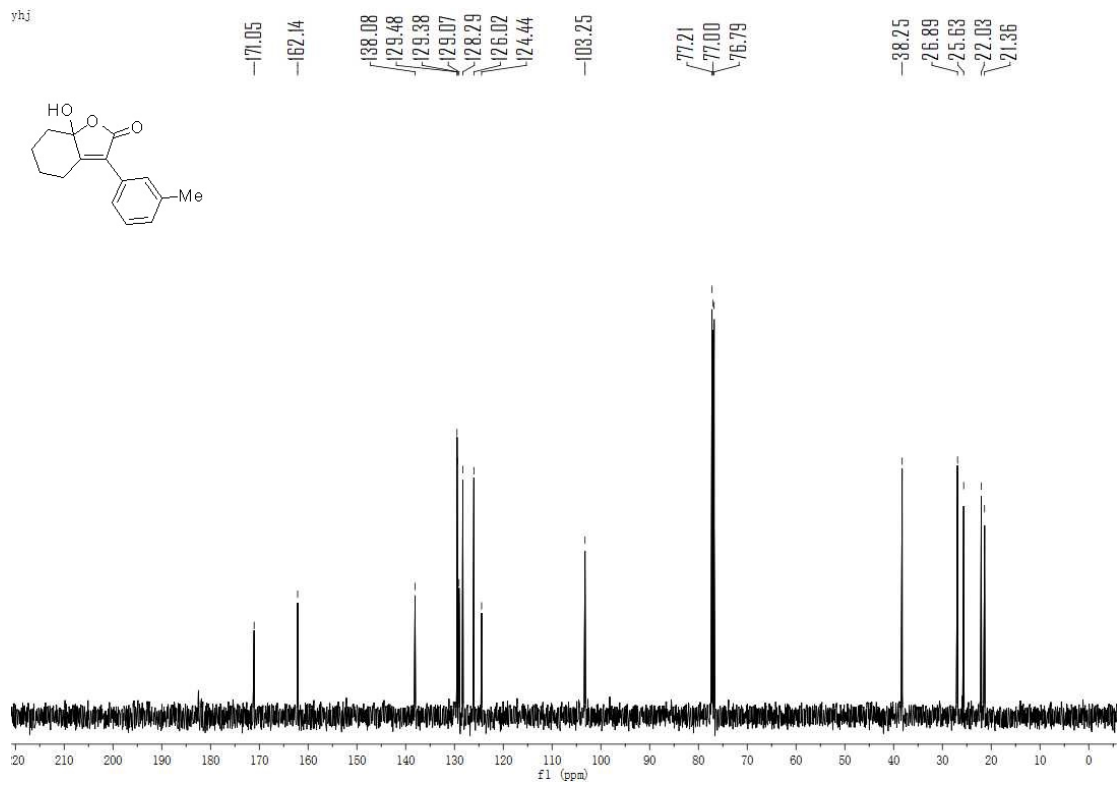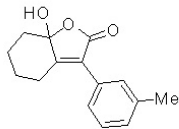

# <sup>1</sup>H NMR spectrum of 3ak

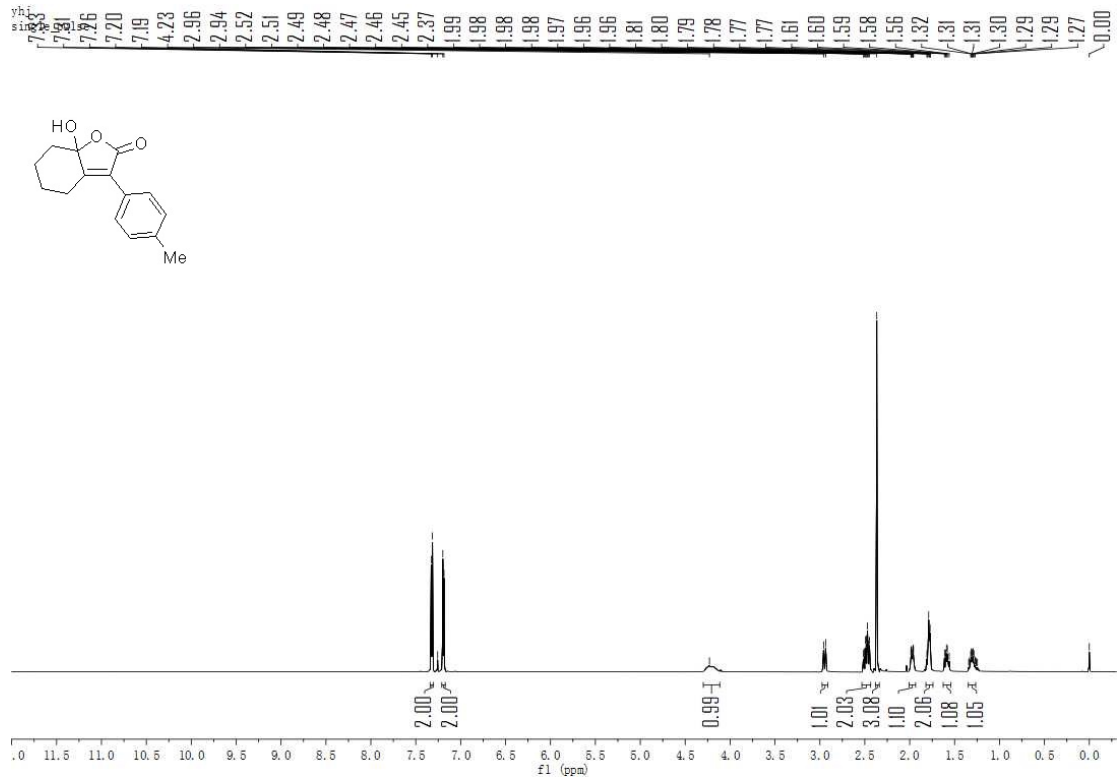

# <sup>13</sup>C NMR spectrum of 3ak

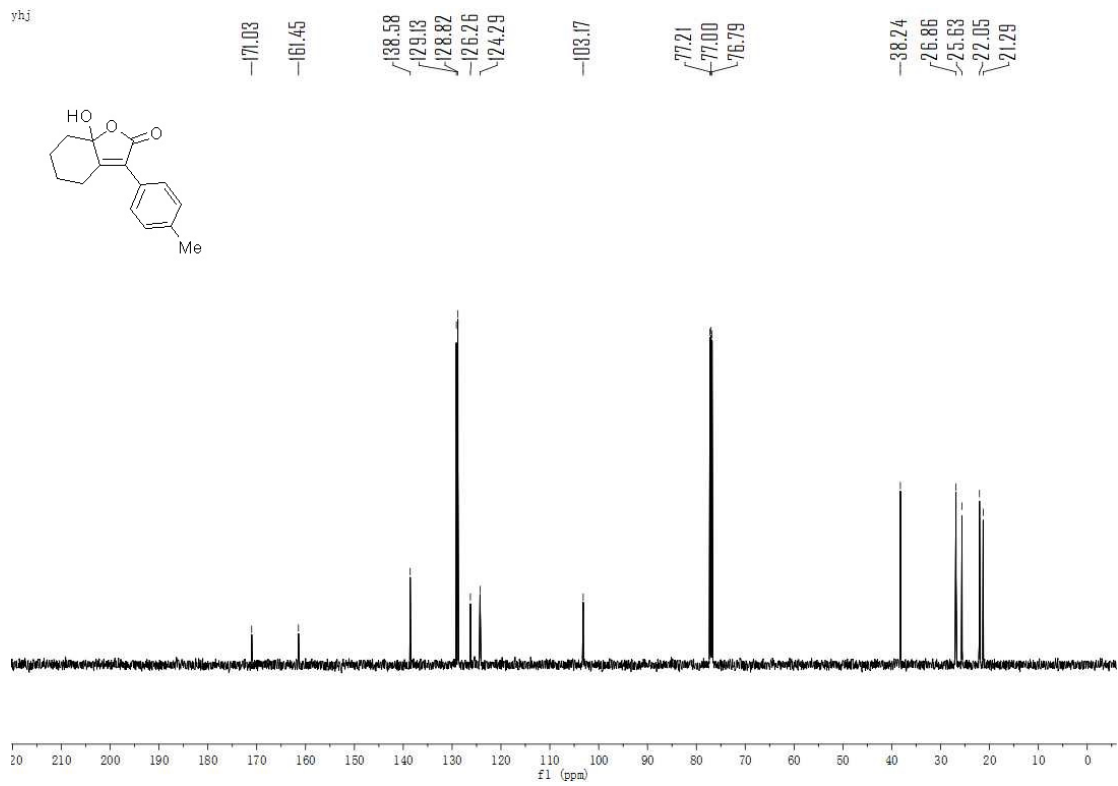

# <sup>1</sup>H NMR spectrum of 3al

yhj  
single\_pulse

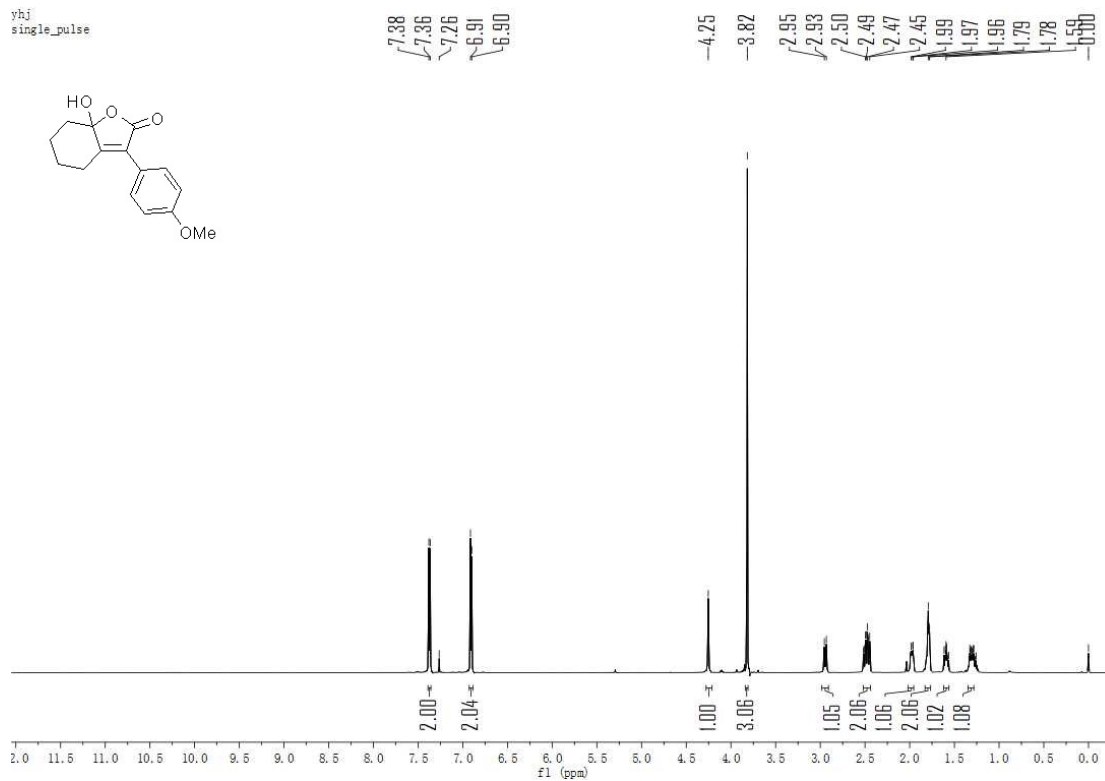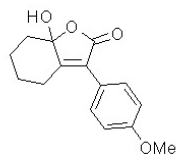

# <sup>13</sup>C NMR spectrum of 3al

yhj

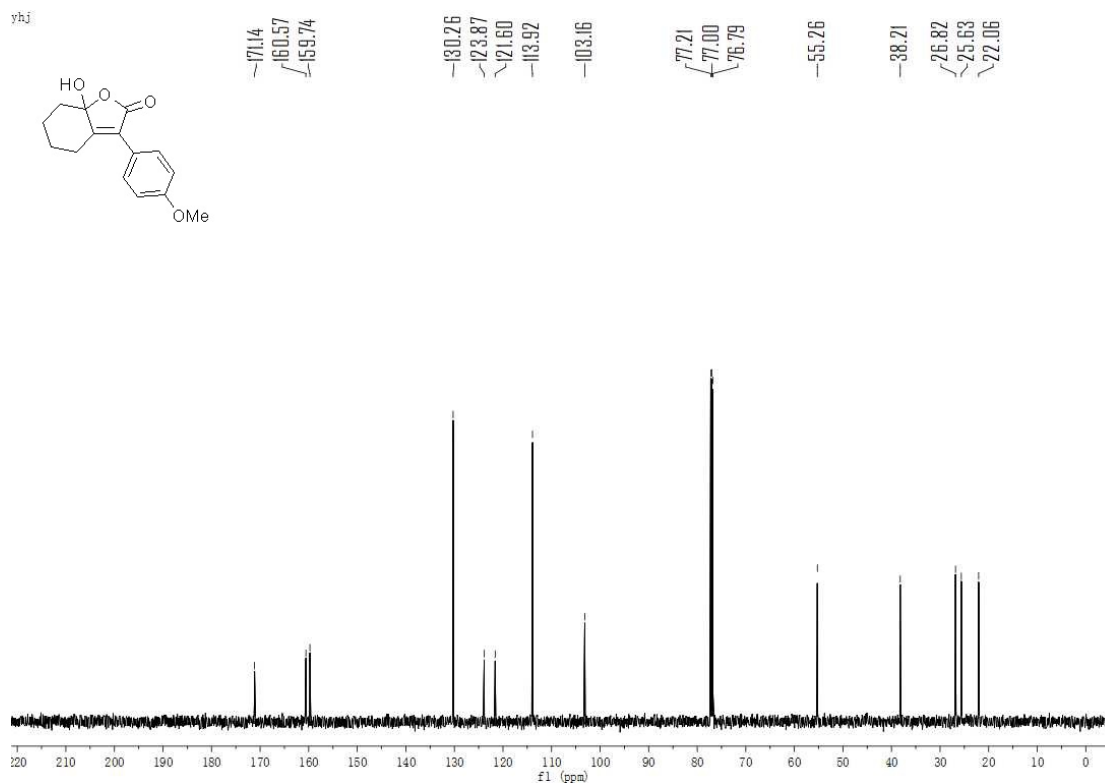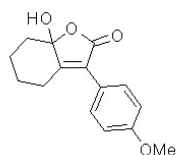



# <sup>1</sup>H NMR spectrum of 3am

yhj  
single\_pulse

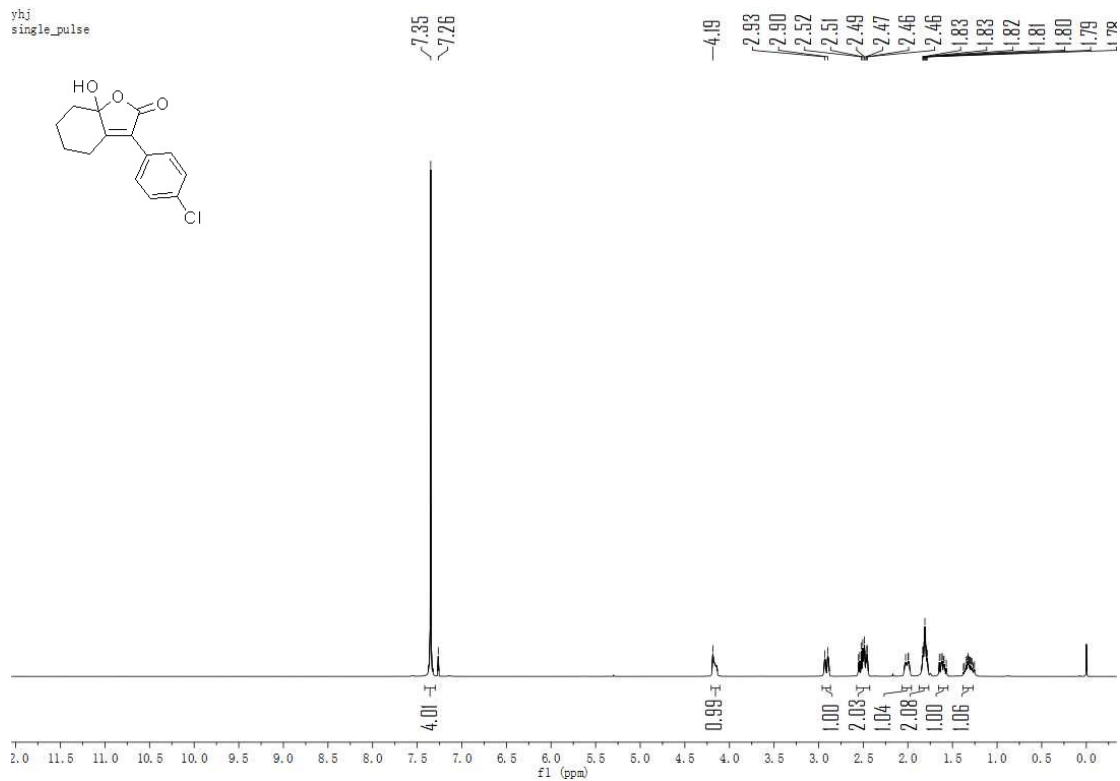

# <sup>13</sup>C NMR spectrum of 3am

yhj  
single\_pulse decoupled gated NOE

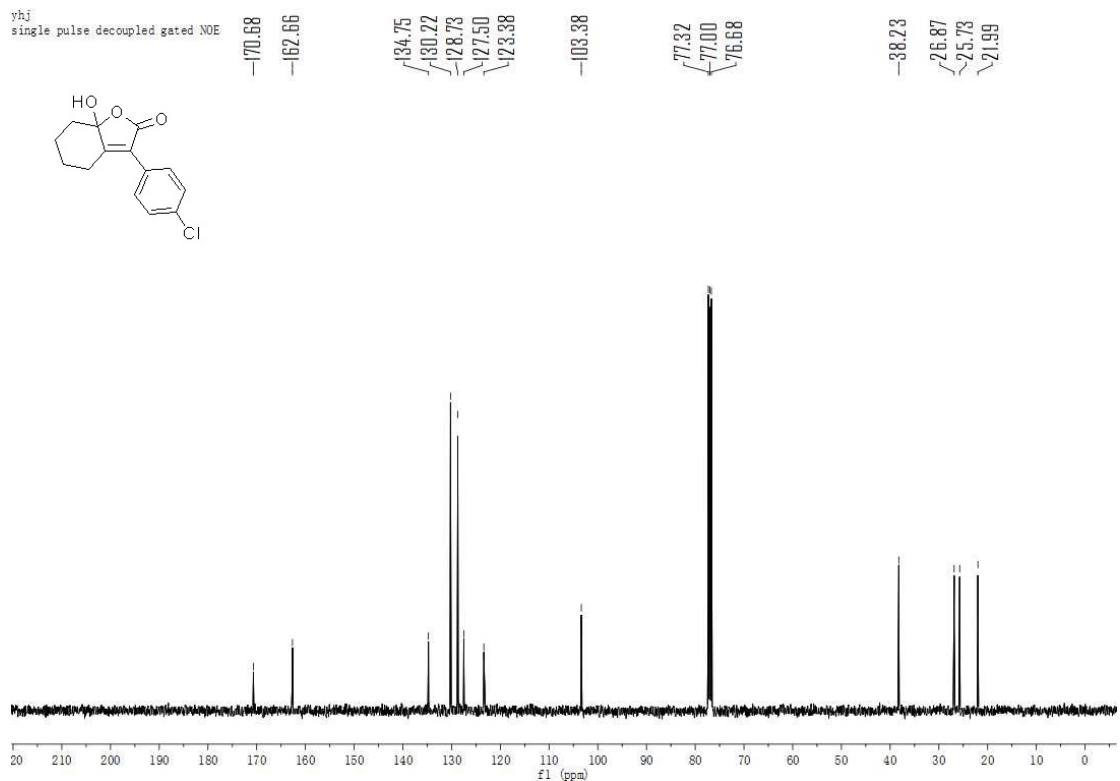

### <sup>1</sup>H NMR spectrum of 3an

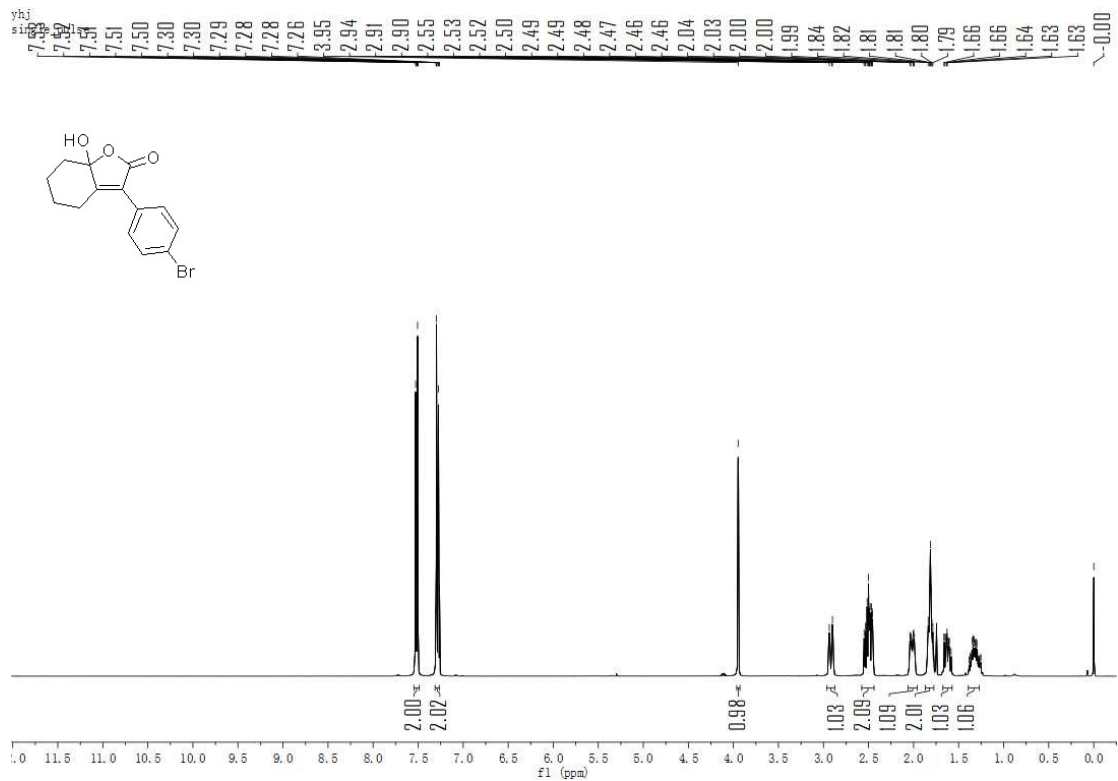

### <sup>13</sup>C NMR spectrum of 3an

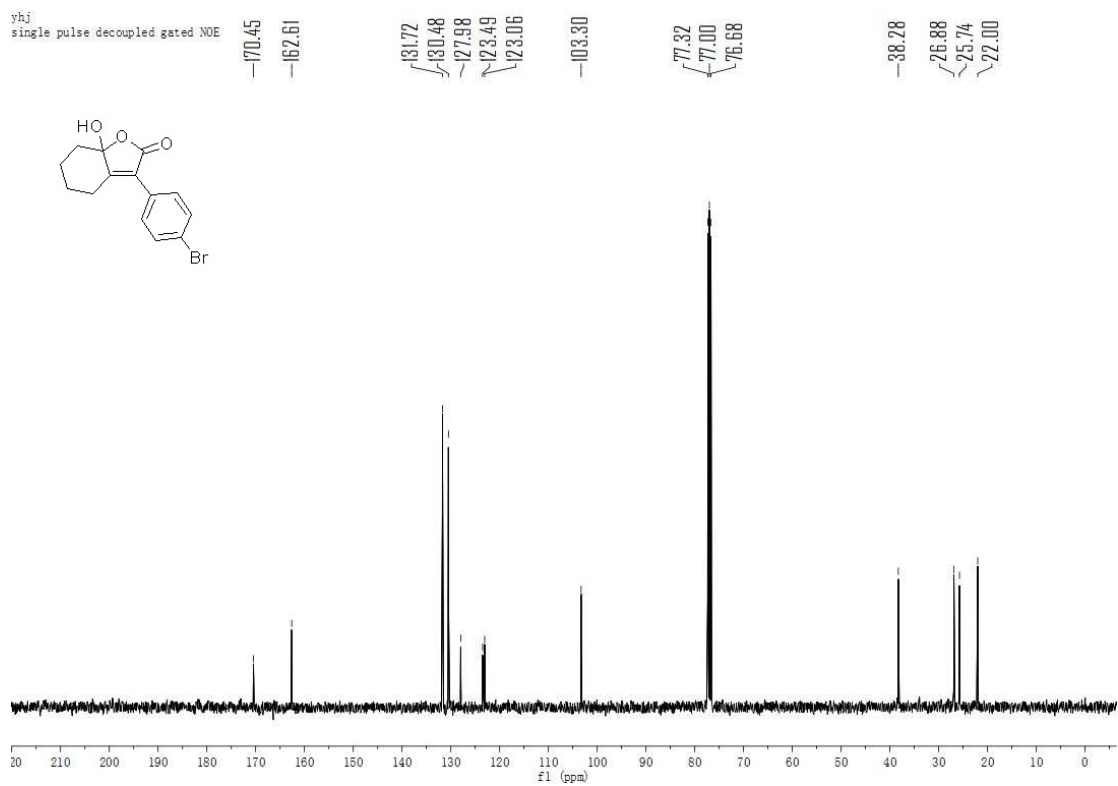

### <sup>1</sup>H NMR spectrum of 3ao

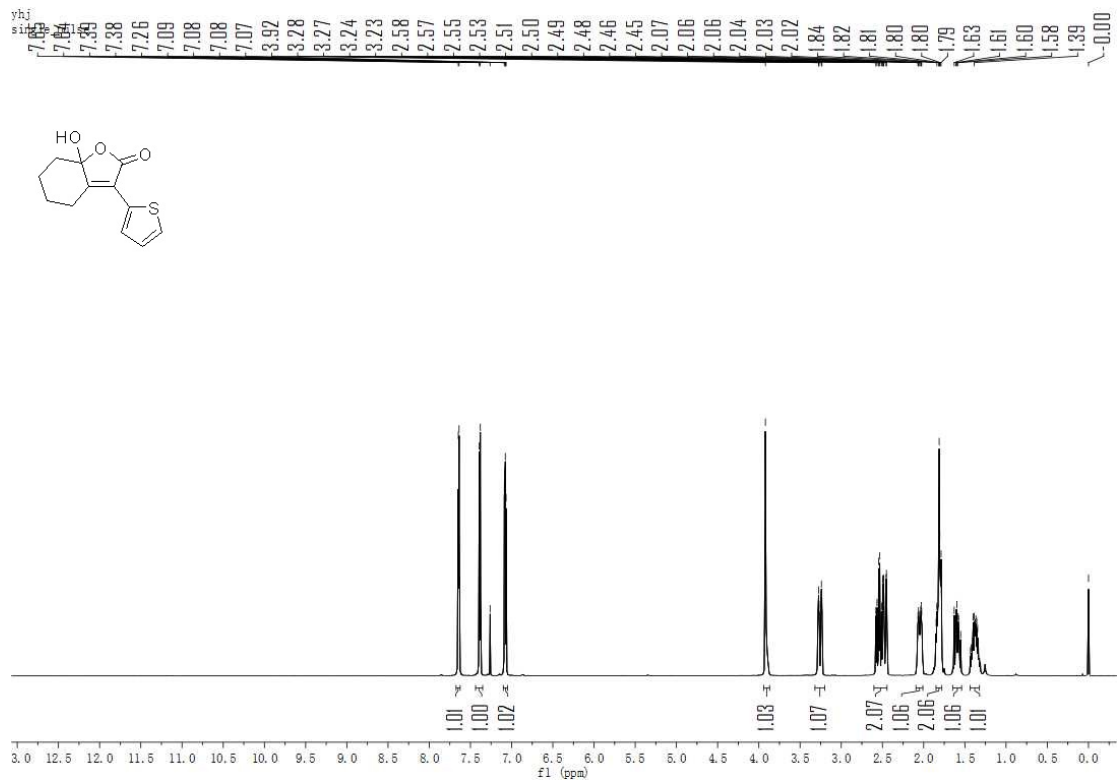

### <sup>13</sup>C NMR spectrum of 3ao

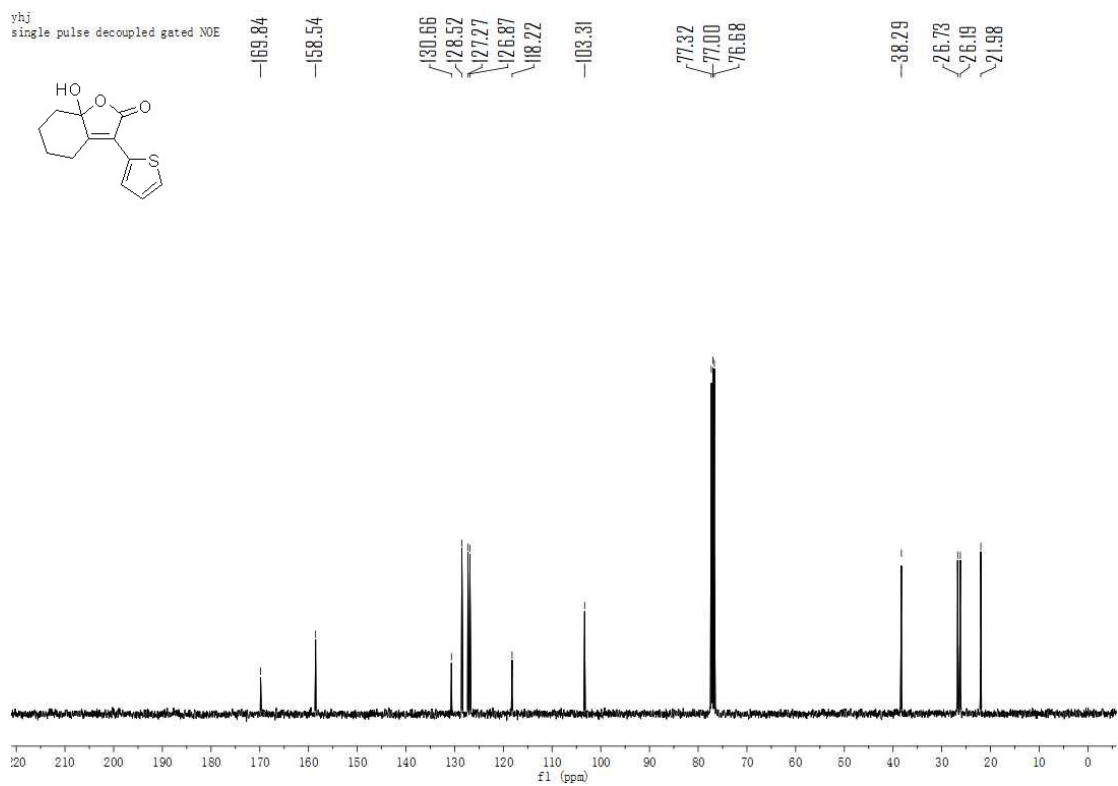

### <sup>1</sup>H NMR spectrum of 3ap

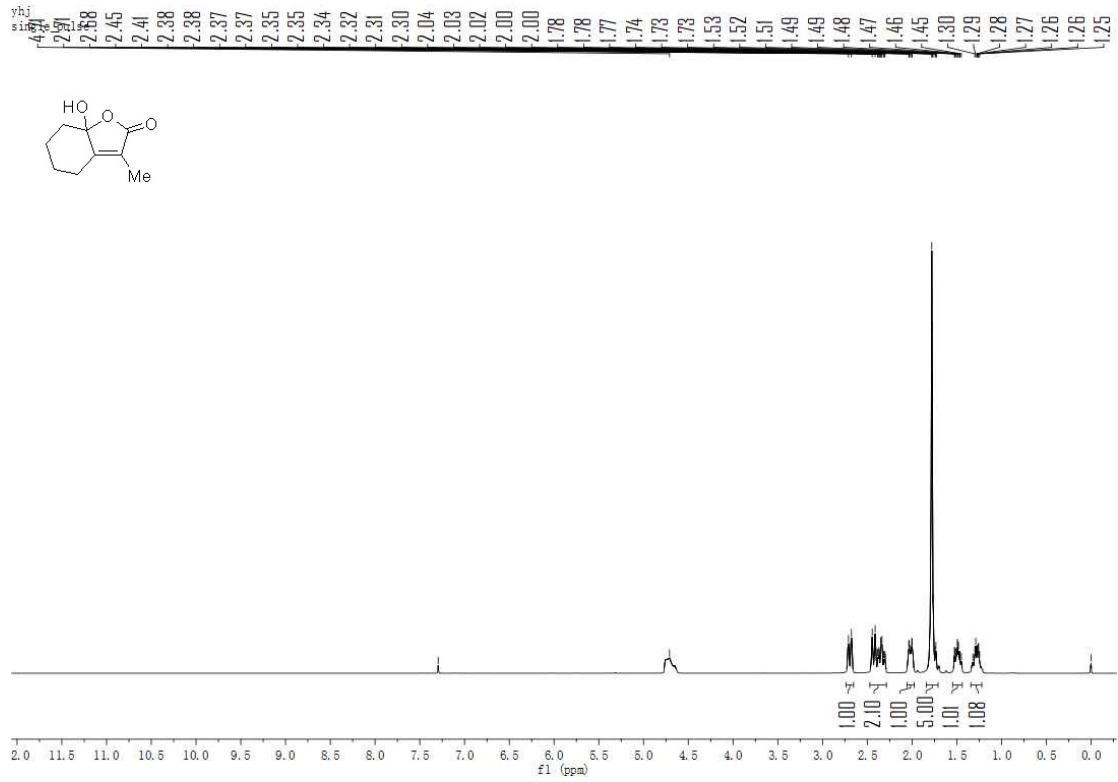

### <sup>13</sup>C NMR spectrum of 3ap

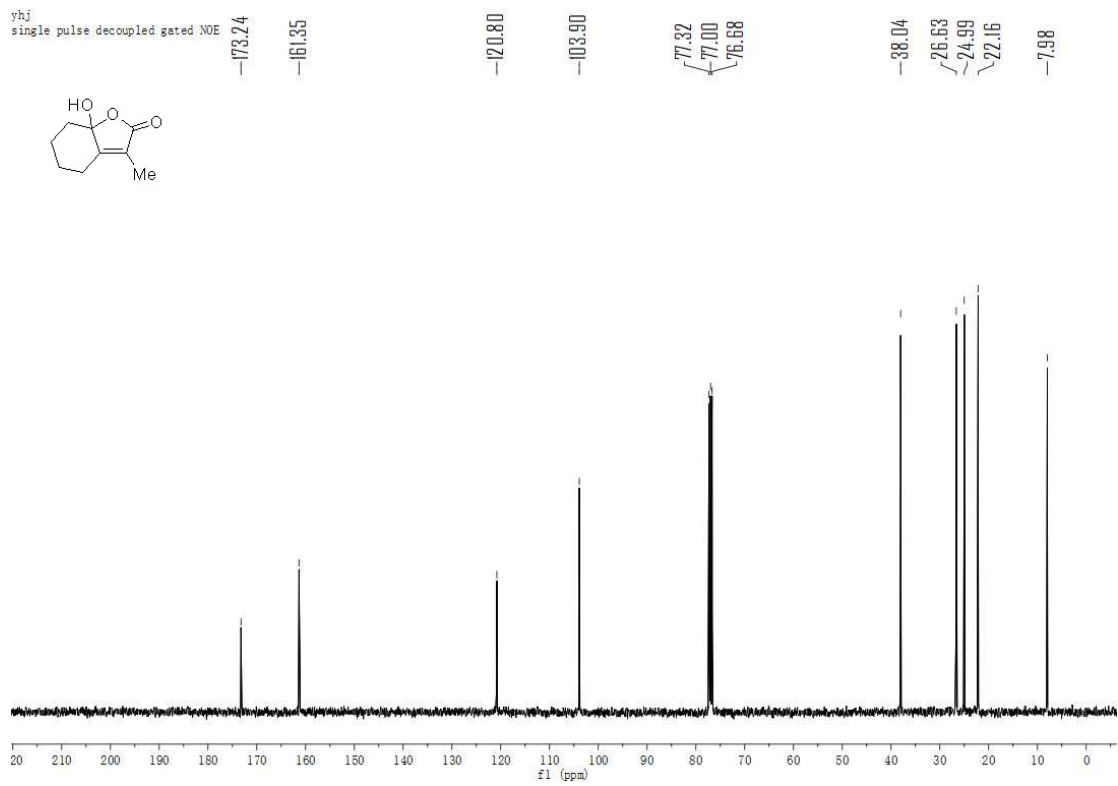

# <sup>1</sup>H NMR spectrum of 4aa

yhj  
single\_pulse

7.66 7.66 7.64 7.45 7.44 7.43 7.41 7.37 7.36 7.35 7.35 7.33 7.26 5.94 5.93 2.92 2.91 2.89 2.46 2.45 2.44 2.42 1.92 1.91 1.89 1.88 1.86

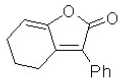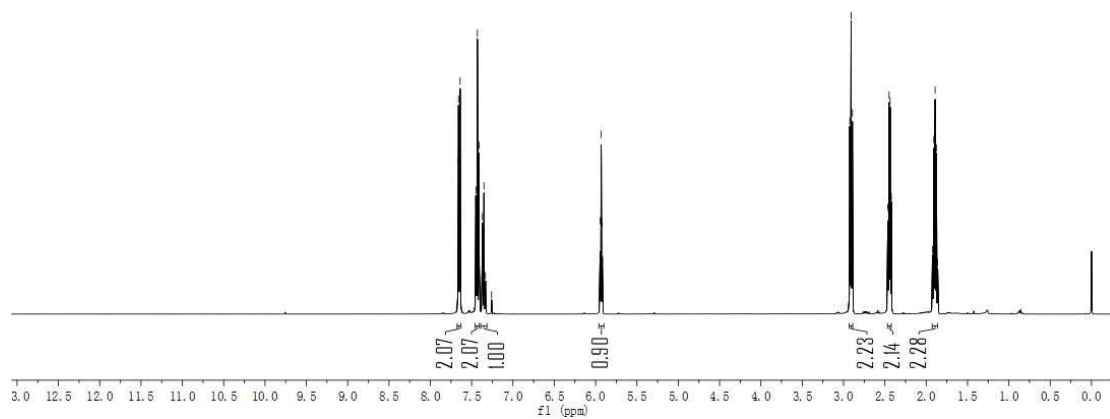

# <sup>13</sup>C NMR spectrum of 4aa

yhj  
single pulse decoupled gated NOE

169.15 149.23 147.67 130.00 128.49 128.43 128.40 121.53 110.79 77.32 77.00 76.68 24.27 23.57 22.66

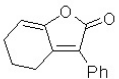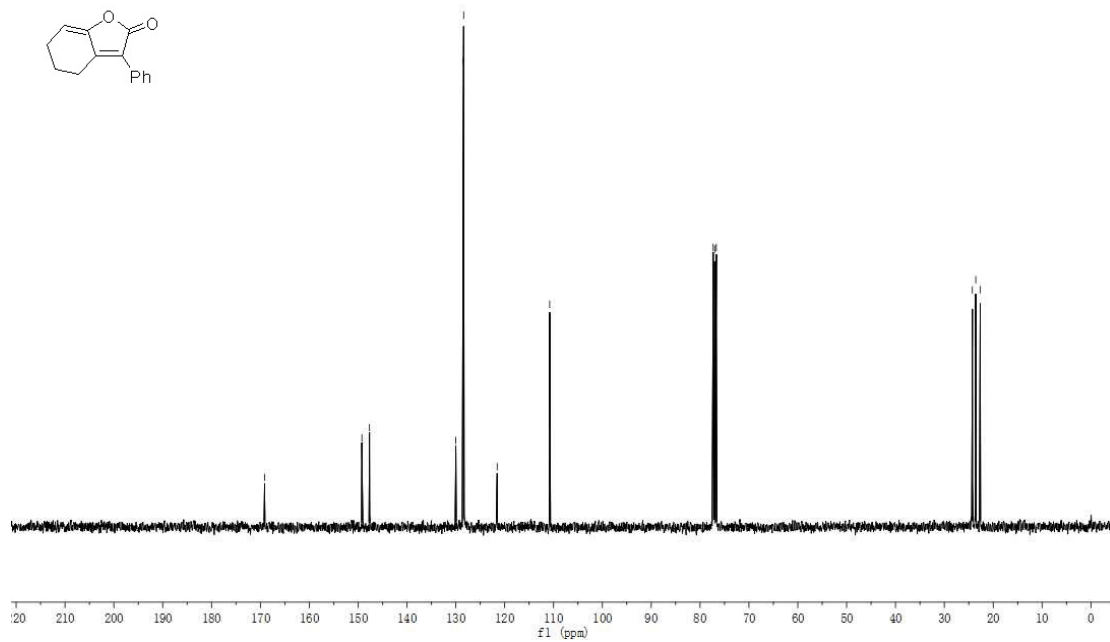

# <sup>1</sup>H NMR spectrum of 4ab

yhj  
single\_pulse

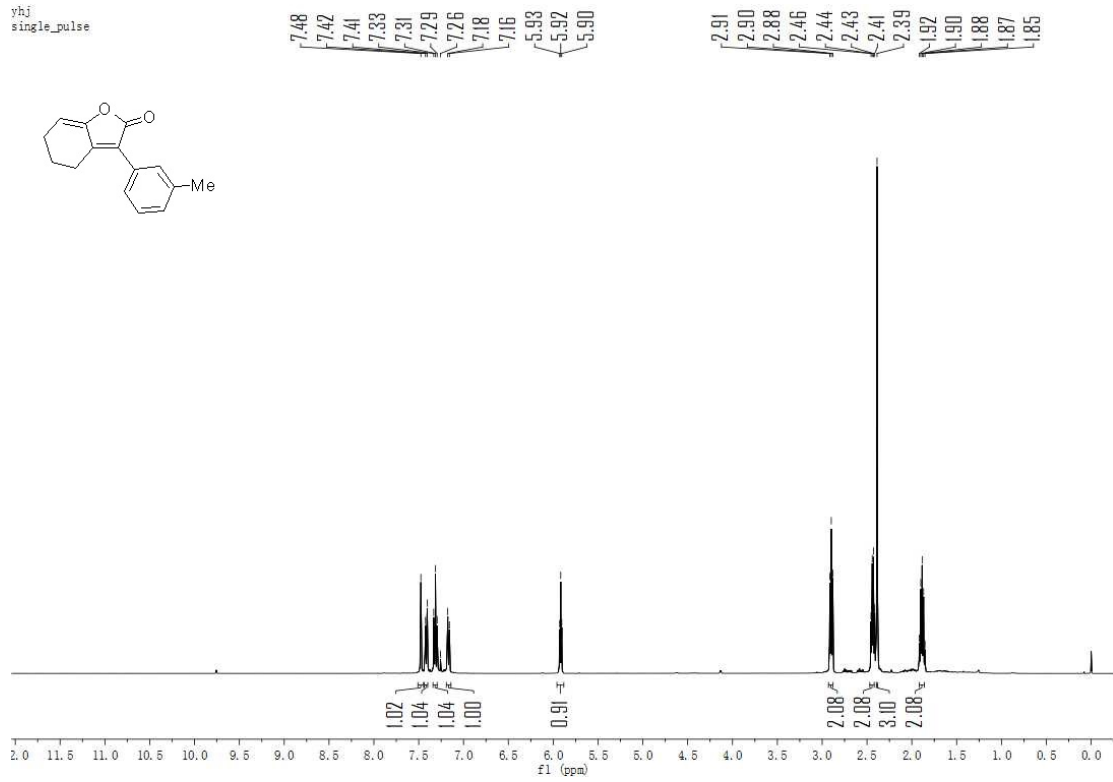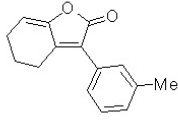

# <sup>13</sup>C NMR spectrum of 4ab

yhj  
single\_pulse decoupled gated NOE

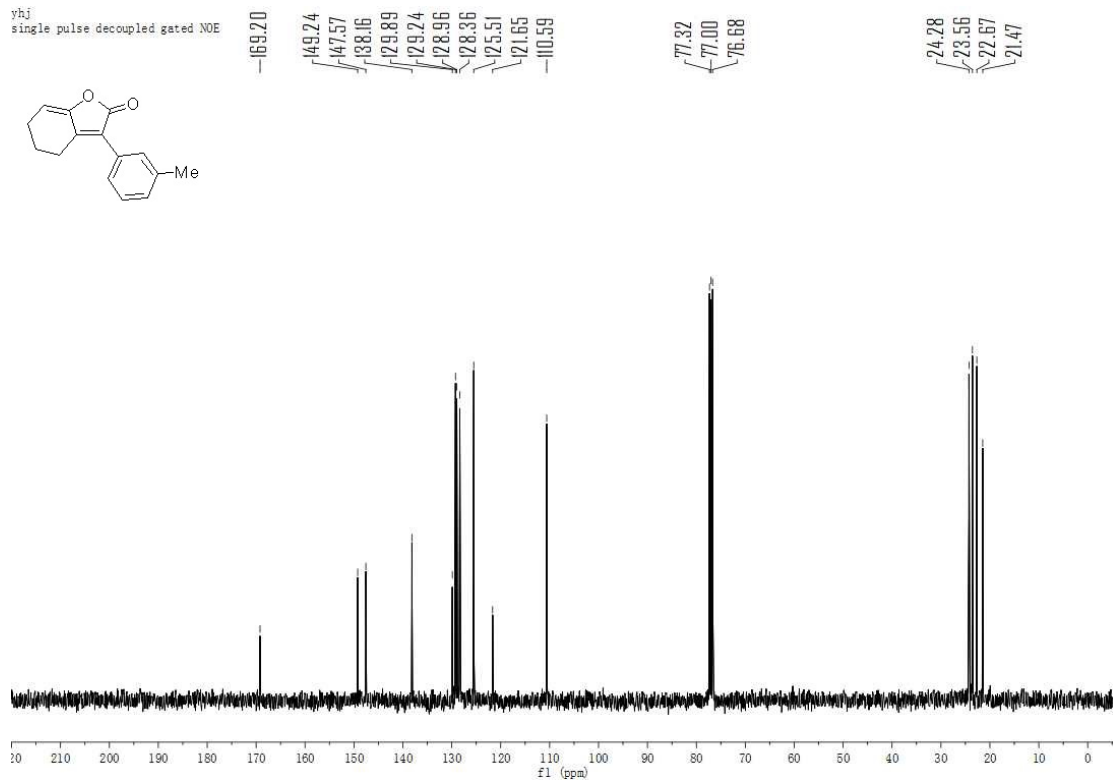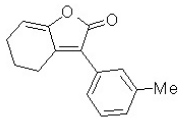

# <sup>1</sup>H NMR spectrum of 4ac

yhj  
single\_pulse

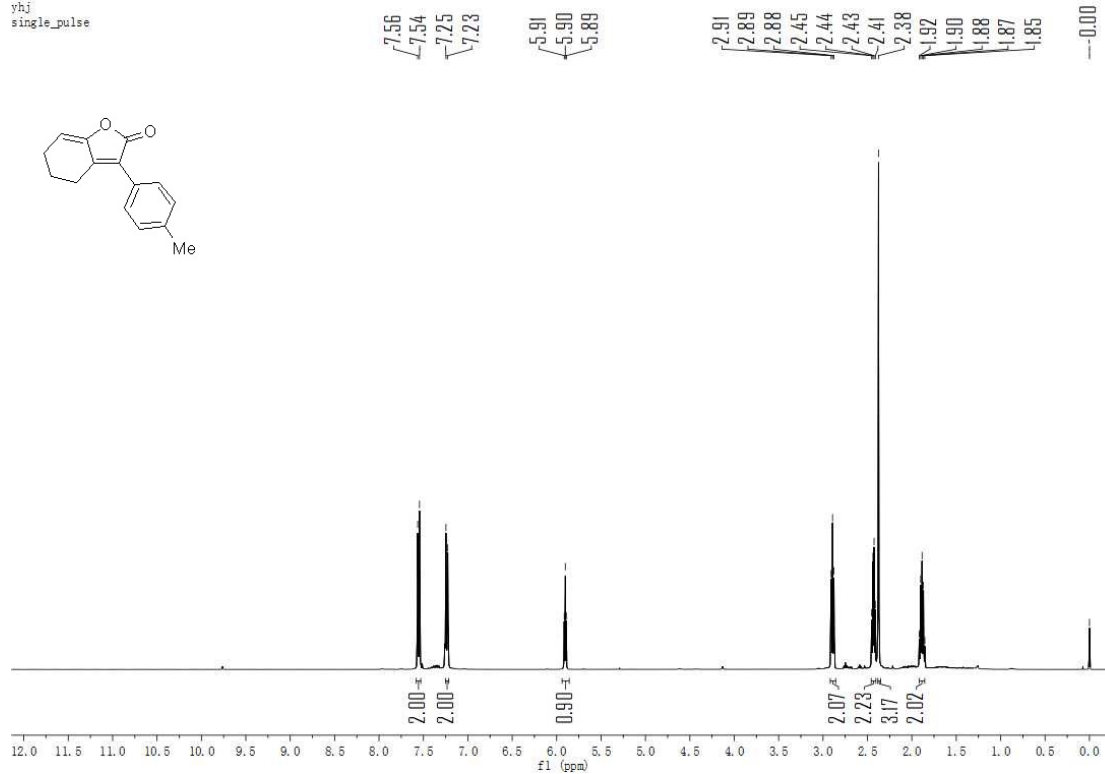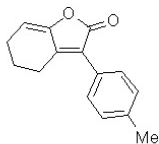

# <sup>13</sup>C NMR spectrum of 4ac

yhj  
single\_pulse decoupled gated NOE

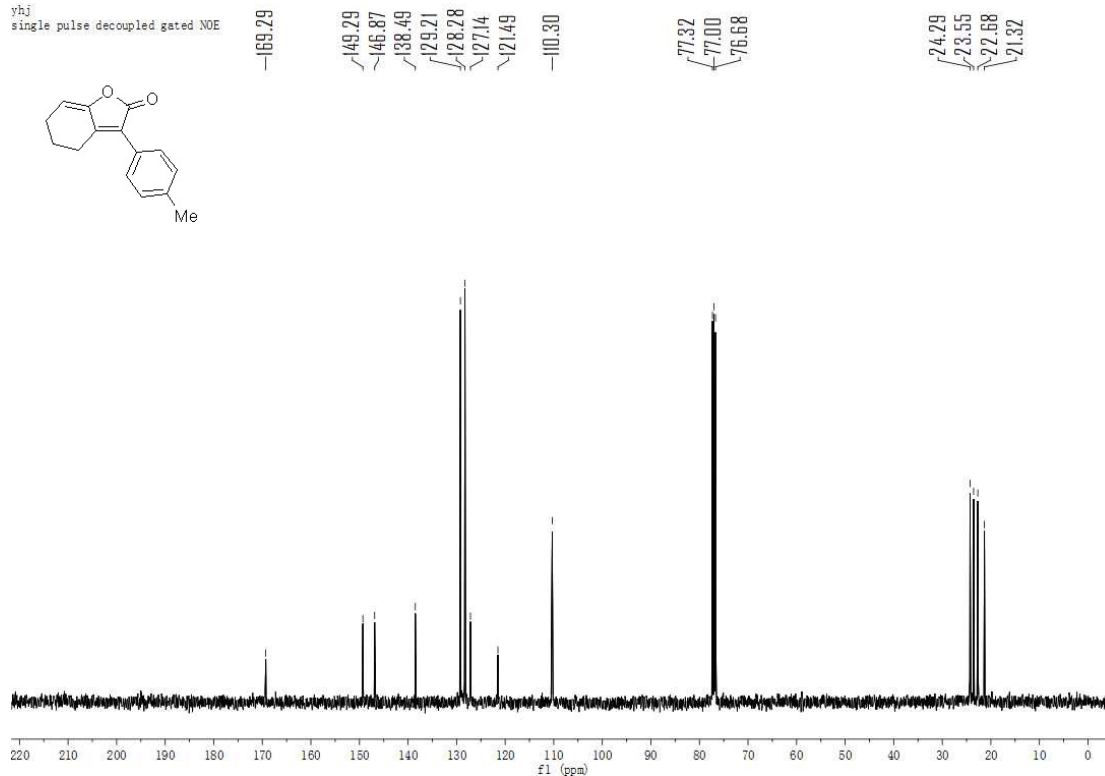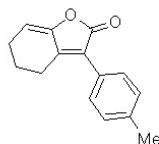

# <sup>1</sup>H NMR spectrum of 4ad

yhj  
single\_pulse

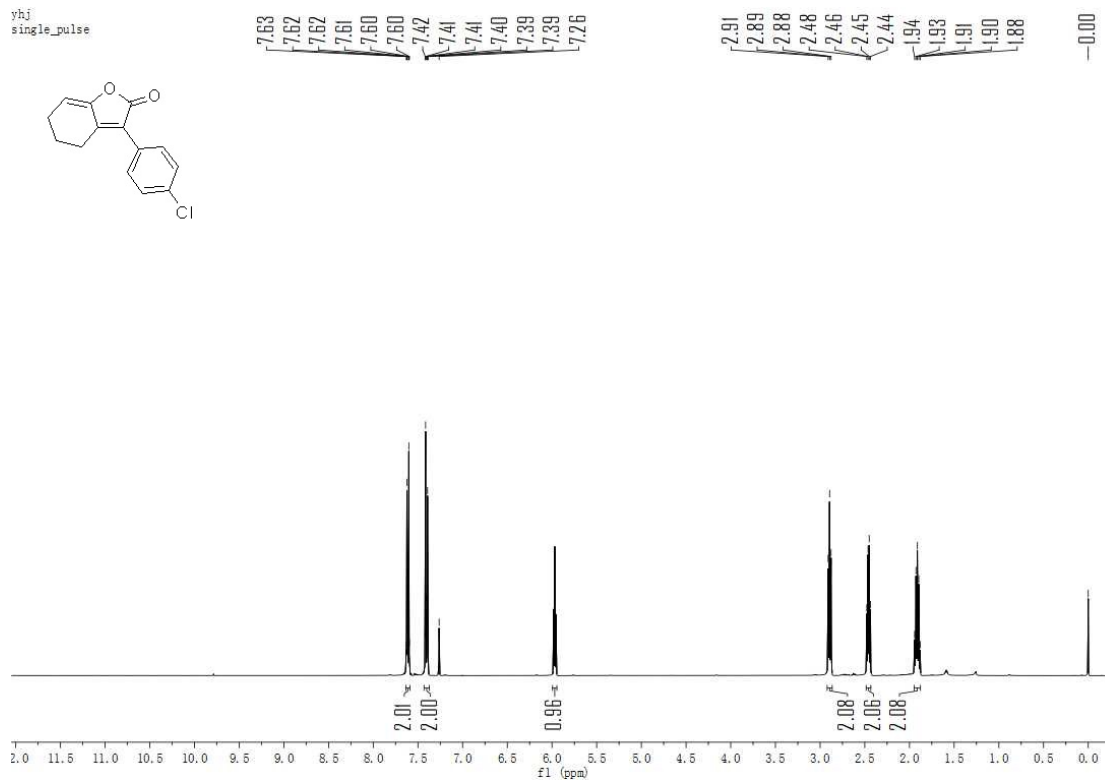

# <sup>13</sup>C NMR spectrum of 4ad

yhj  
single\_pulse decoupled gated NOE

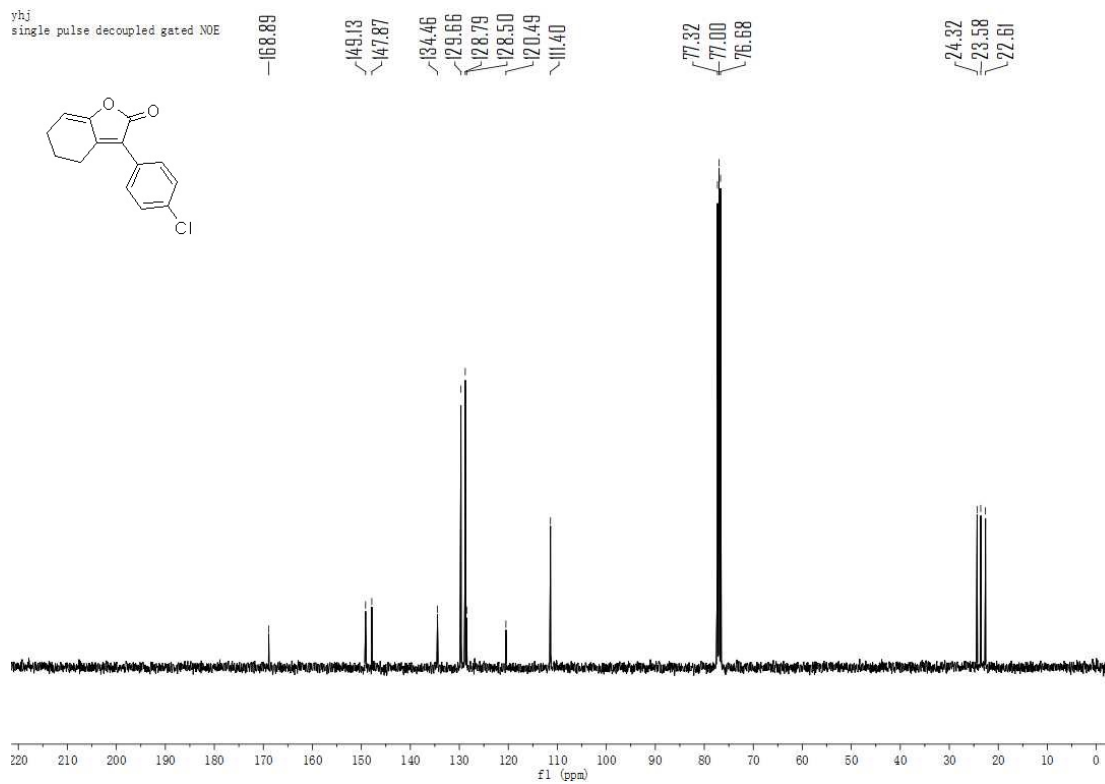



# <sup>1</sup>H NMR spectrum of 4ae

yhj  
single\_pulse

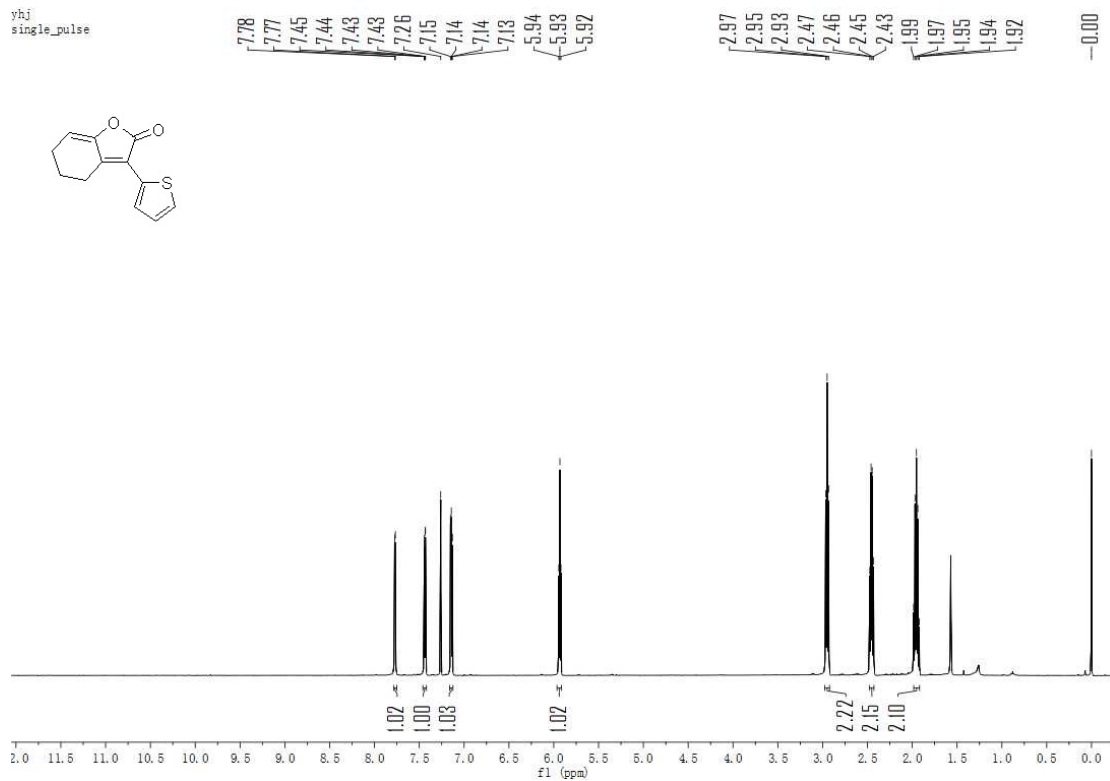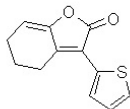

# <sup>13</sup>C NMR spectrum of 4ae

yhj  
single\_pulse decoupled gated NOE

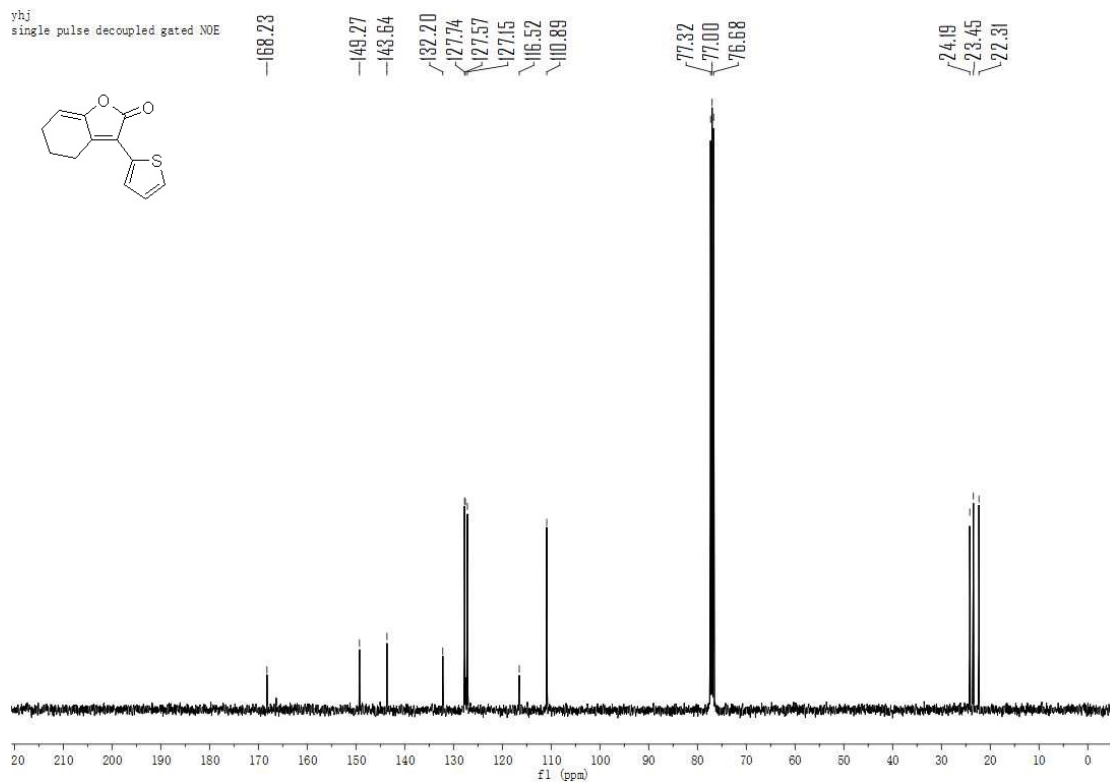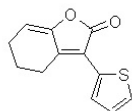

# <sup>1</sup>H NMR spectrum of 4af

yhj  
single\_pulse

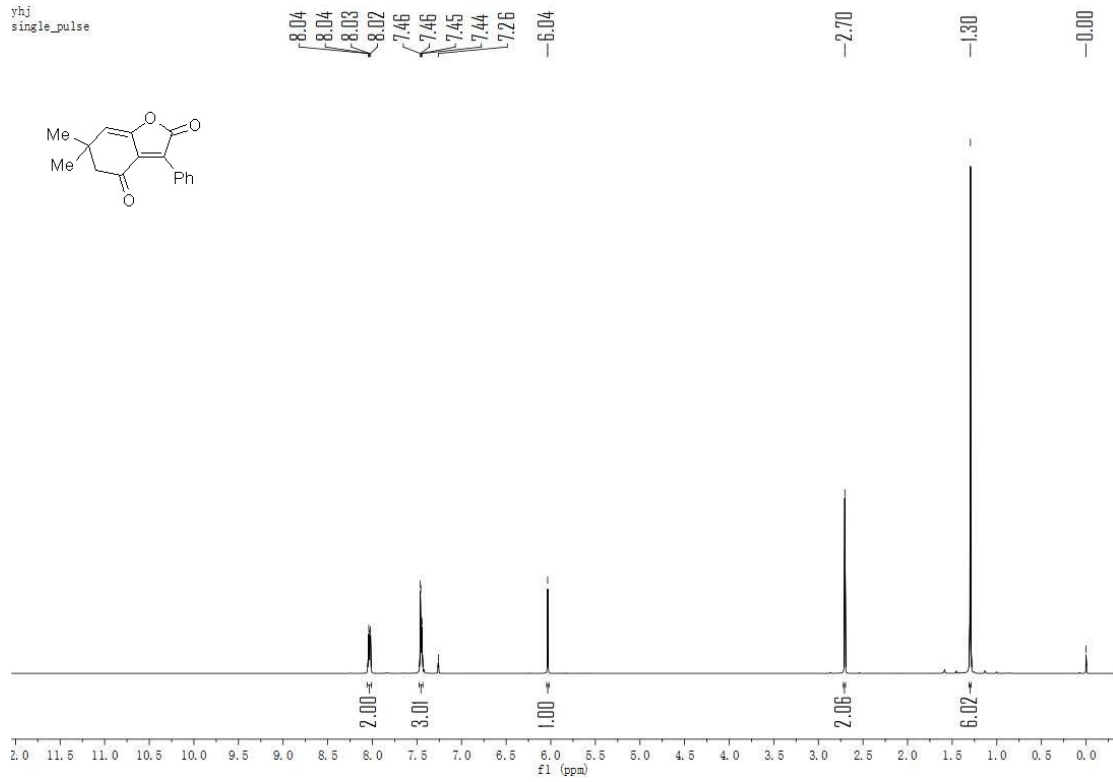

# <sup>13</sup>C NMR spectrum of 4af

yhj  
single\_pulse decoupled gated NOE

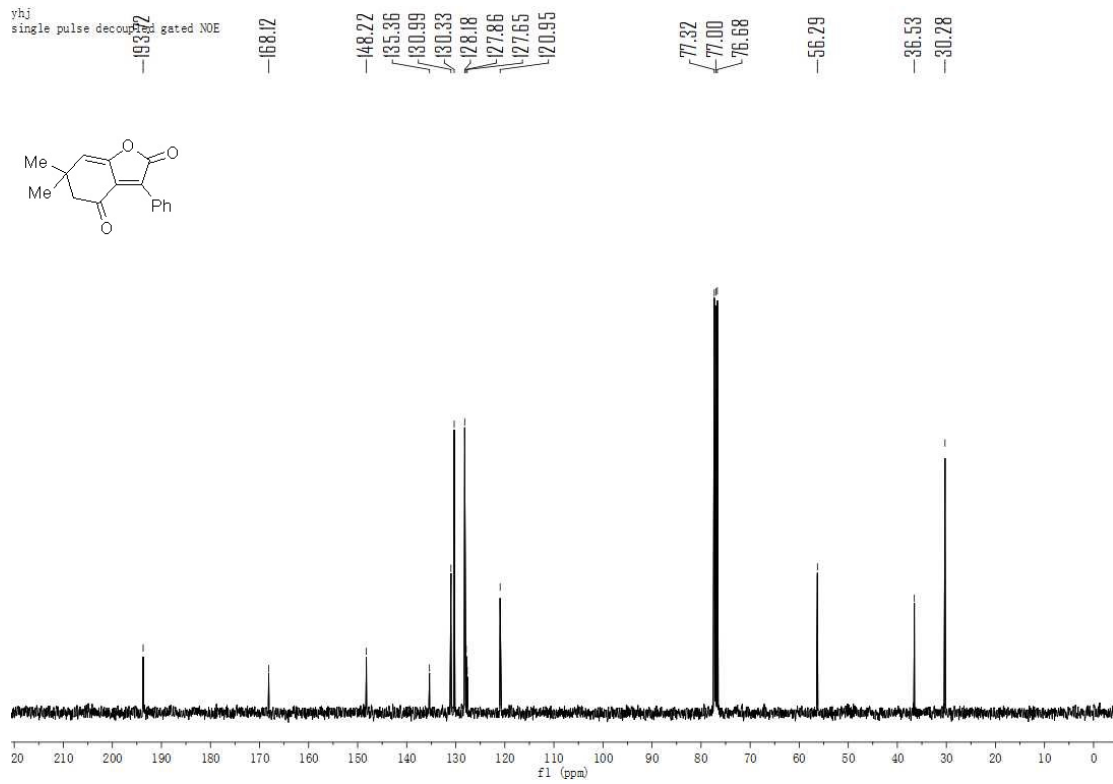

# <sup>1</sup>H NMR spectrum of 4ag

yhj  
single\_pulse

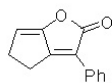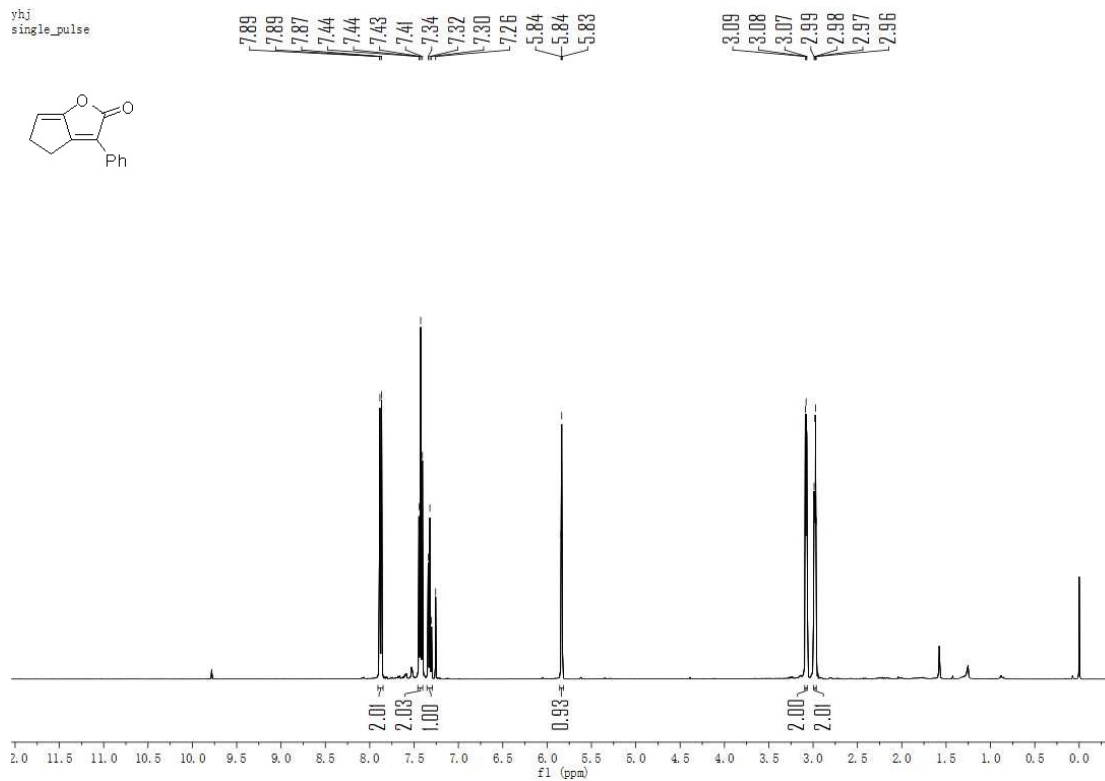

# <sup>13</sup>C NMR spectrum of 4ag

yhj  
single\_pulse decoupled gated NOE

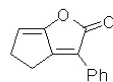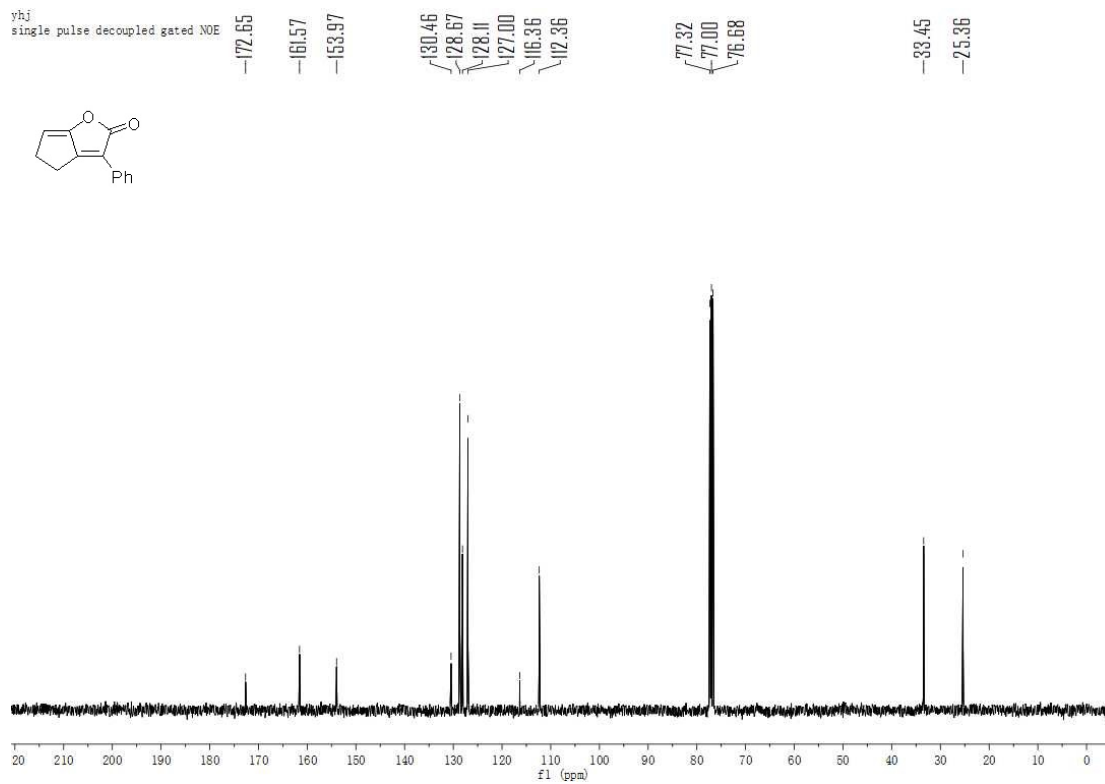

# <sup>1</sup>H NMR spectrum of 4ah

yhj  
single\_pulse

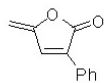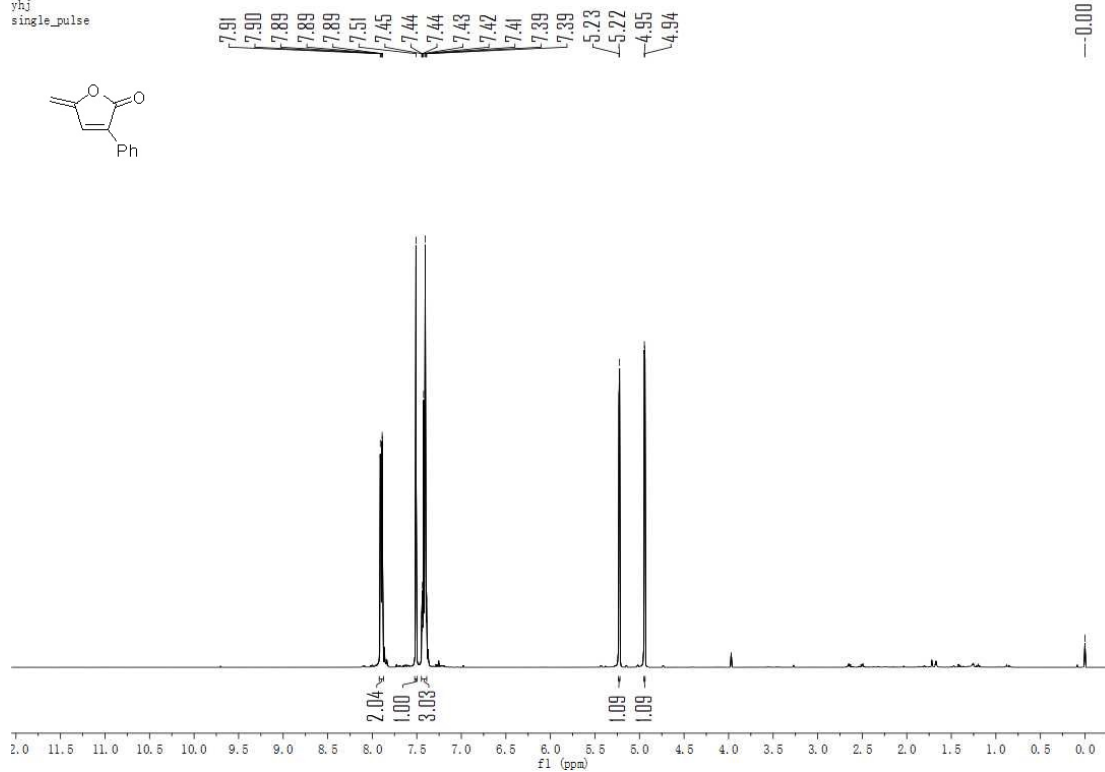

# <sup>13</sup>C NMR spectrum of 4ah

yhj  
single\_pulse decoupled gated NOE

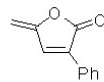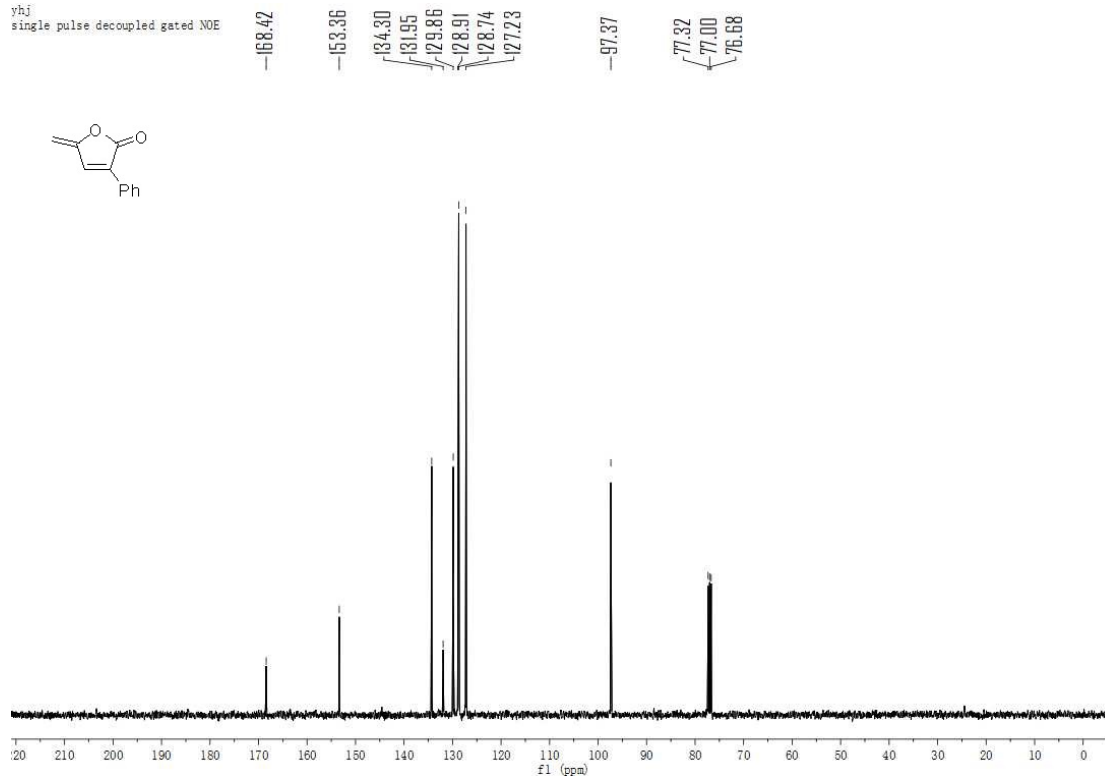

### <sup>1</sup>H NMR spectrum of 4ai

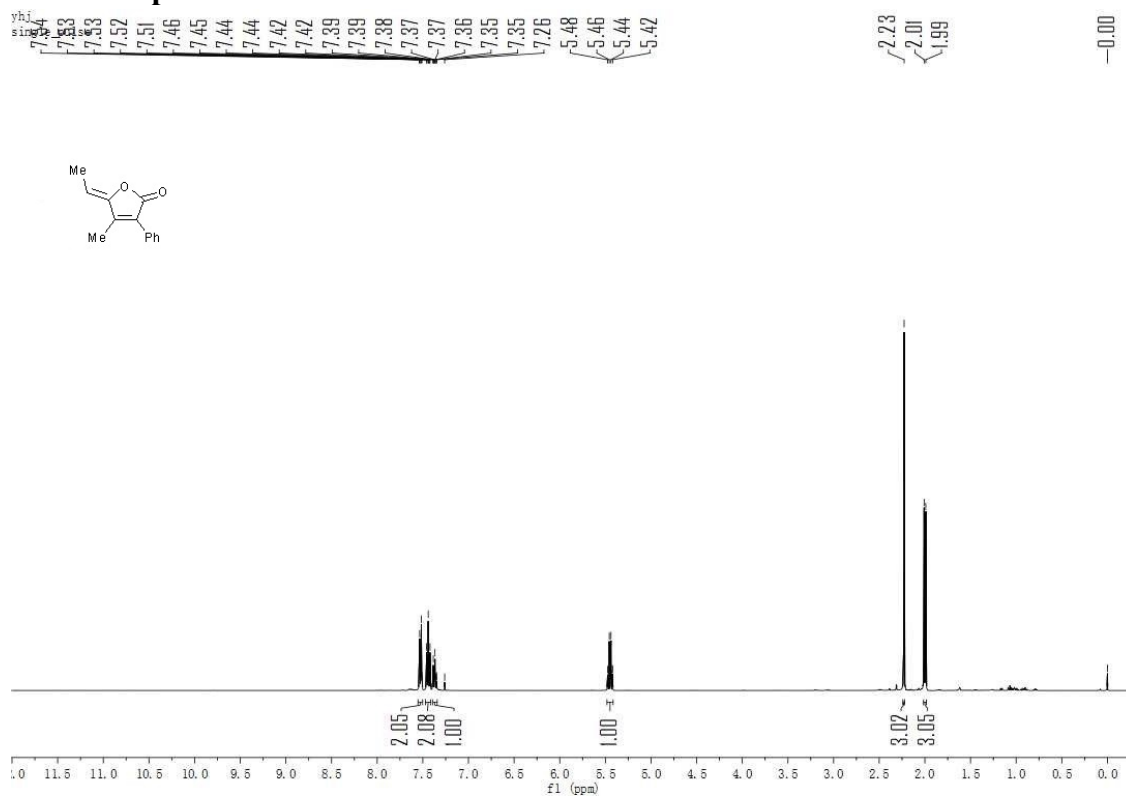

### <sup>13</sup>C NMR spectrum of 4ai

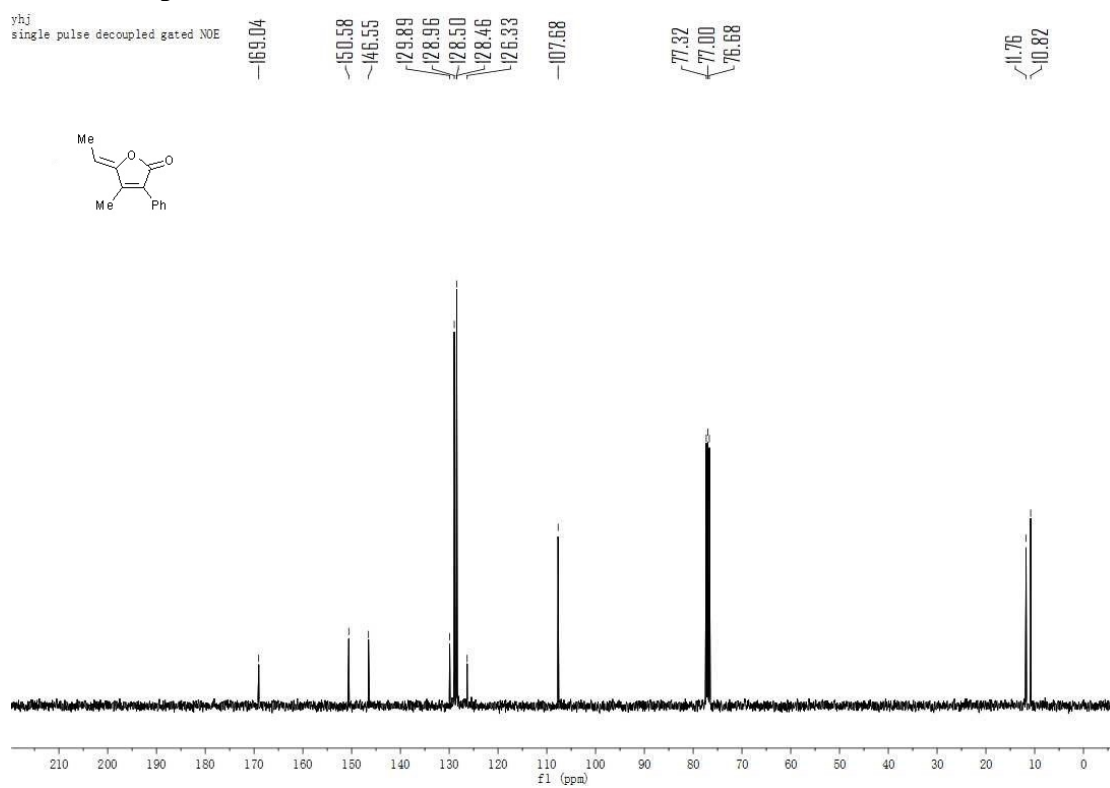

Supplement: d2ra04546j1.pdf [file d2ra04546j1.pdf]
